# Supplementary material for: A stereoselective total synthesis of 7,8-O-isopropylidene iriomoteolide-3a
Source: Royal Society of Chemistry journal article supplement (doi:10.1039/c0ob01253j), 2011-01-01
Supplement: c0ob01253j.pdf [file c0ob01253j.pdf]

## Supporting Information for

### A Stereoselective Total Synthesis of 7,8-*O*-isopropylidene

#### Iriomoteolide-3a

Yao Zhang, Lisheng Deng, Gang Zhao\*

*Laboratory of Modern Synthetic Organic Chemistry, Shanghai Institute of Organic Chemistry, Chinese Academy of Sciences, 345 LingLing Road, Shanghai 200032, China.*

|                                                                                                         |        |
|---------------------------------------------------------------------------------------------------------|--------|
| General information                                                                                     | S2     |
| Spectra of the corresponding compounds                                                                  | S2-S39 |
| <sup>1</sup> H NMR for <b>15</b>                                                                        | S 3    |
| <sup>1</sup> H NMR & <sup>13</sup> C NMR for <b>16</b> .                                                | S 3    |
| <sup>1</sup> H NMR & <sup>13</sup> C NMR for <b>17</b>                                                  | S 5    |
| <sup>1</sup> H NMR & <sup>13</sup> C NMR for <b>7</b>                                                   | S 6    |
| <sup>1</sup> H NMR & <sup>13</sup> C NMR for <b>18</b>                                                  | S 7    |
| <sup>1</sup> H NMR & <sup>13</sup> C NMR for <b>19</b>                                                  | S 8    |
| <sup>1</sup> H NMR & <sup>13</sup> C NMR for <b>20</b>                                                  | S 9    |
| <sup>1</sup> H NMR & <sup>13</sup> C NMR for <b>21</b>                                                  | S 10   |
| <sup>1</sup> H NMR & <sup>13</sup> C NMR for <b>2</b>                                                   | S 11   |
| <sup>1</sup> H NMR for <b>12</b>                                                                        | S 12   |
| <sup>1</sup> H NMR & <sup>13</sup> C NMR for <b>24</b>                                                  | S 13   |
| <sup>1</sup> H NMR & <sup>13</sup> C NMR for <b>26</b>                                                  | S 14   |
| <sup>1</sup> H NMR & <sup>13</sup> C NMR for <b>8</b>                                                   | S 15   |
| <sup>1</sup> H NMR & <sup>13</sup> C NMR for <b>27</b>                                                  | S 16   |
| <sup>1</sup> H NMR & <sup>13</sup> C NMR for <b>28</b>                                                  | S 17   |
| <sup>1</sup> H NMR & <sup>13</sup> C NMR for <b>29</b>                                                  | S 18   |
| <sup>1</sup> H NMR & <sup>13</sup> C NMR for <b>30</b>                                                  | S 19   |
| <sup>1</sup> H NMR & <sup>13</sup> C NMR for <b>31</b>                                                  | S 20   |
| <sup>1</sup> H NMR & <sup>13</sup> C NMR for <b>3</b>                                                   | S 21   |
| <sup>1</sup> H NMR & <sup>13</sup> C NMR for <b>4</b>                                                   | S 22   |
| <sup>1</sup> H NMR & <sup>13</sup> C NMR for <b>33</b>                                                  | S 23   |
| <sup>1</sup> H NMR & <sup>13</sup> C NMR for <b>34</b>                                                  | S 24   |
| <sup>1</sup> H NMR & <sup>13</sup> C NMR for <b>34</b>                                                  | S 25   |
| <sup>1</sup> H NMR & <sup>13</sup> C NMR for 7,8- <i>O</i> -isopropylidene Iriomoteolide-3a( <b>1</b> ) | S 26   |
| HPLC spectrum for <b>23</b>                                                                             | S 27   |

**General information:** All solvents were distilled prior to use except where noted. All reactions sensitive to moisture or oxygen were conducted under an atmosphere of nitrogen or argon using flame-dried or oven-dried (300 °C) glassware. Crushed 4Å molecular sieves were activated by flame-drying immediately prior to use. Tetrahydrofuran (THF), diethyl ether (Et<sub>2</sub>O) and toluene (PhCH<sub>3</sub>) were purified by sodium/benzophenone. Dichloromethane (CH<sub>2</sub>Cl<sub>2</sub>), N, N-diisopropylethylamine (DIPEA), diisopropylamine, pyridine, triethylamine (TEA) and boron trifluoride etherate were distilled from calcium hydride before use. Dimethylsulfoxide (DMSO) and dimethylformamide (DMF) were distilled from calcium hydride under reduced pressure and stored over 4Å molecular sieves until needed. Reactions were monitored by thin-layer chromatography (TLC) carried out on 0.25 mm silica gel plates visualized with UV light and/or by staining with ethanolic phosphomolybdic acid (PMA). Flash column chromatography was performed on silica gel H (10-40 μ). NMR spectra were recorded on 300 or 500 MHz instruments. Chemical shifts (δ) are given in ppm relative to TMS, coupling constants (*J*) in Hz. IR spectra were recorded on a spectrometer. Optical rotations were taken. Mass spectra (MS) were measured with a spectrometer. High resolution mass spectra (HRMS) were recorded on a mass spectrometer. Elemental analyses were performed. Melting point were measured on a digital melting-point apparatus.

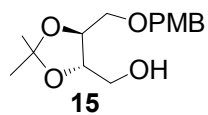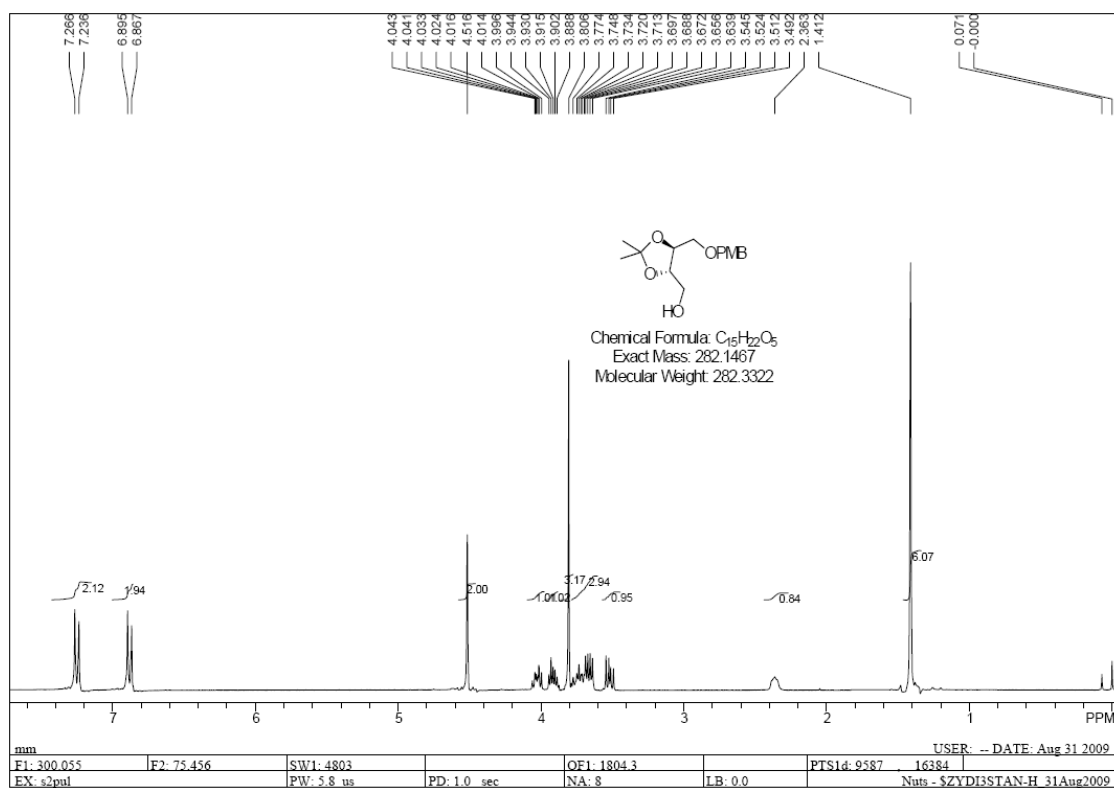

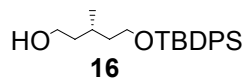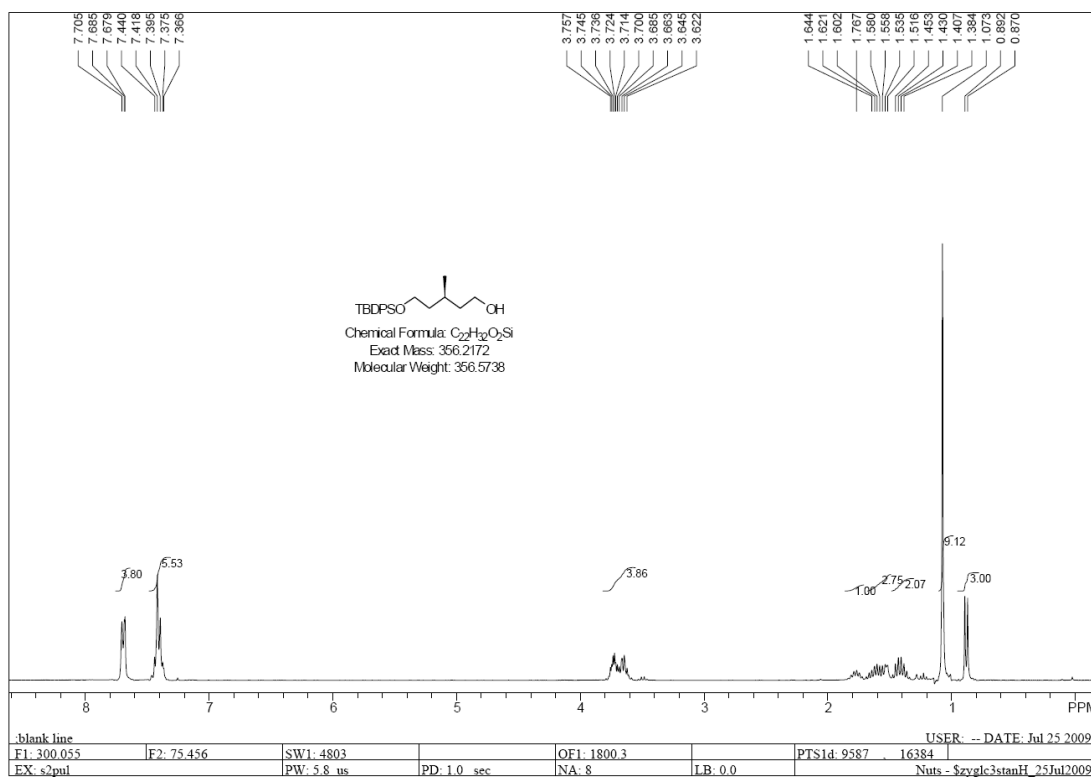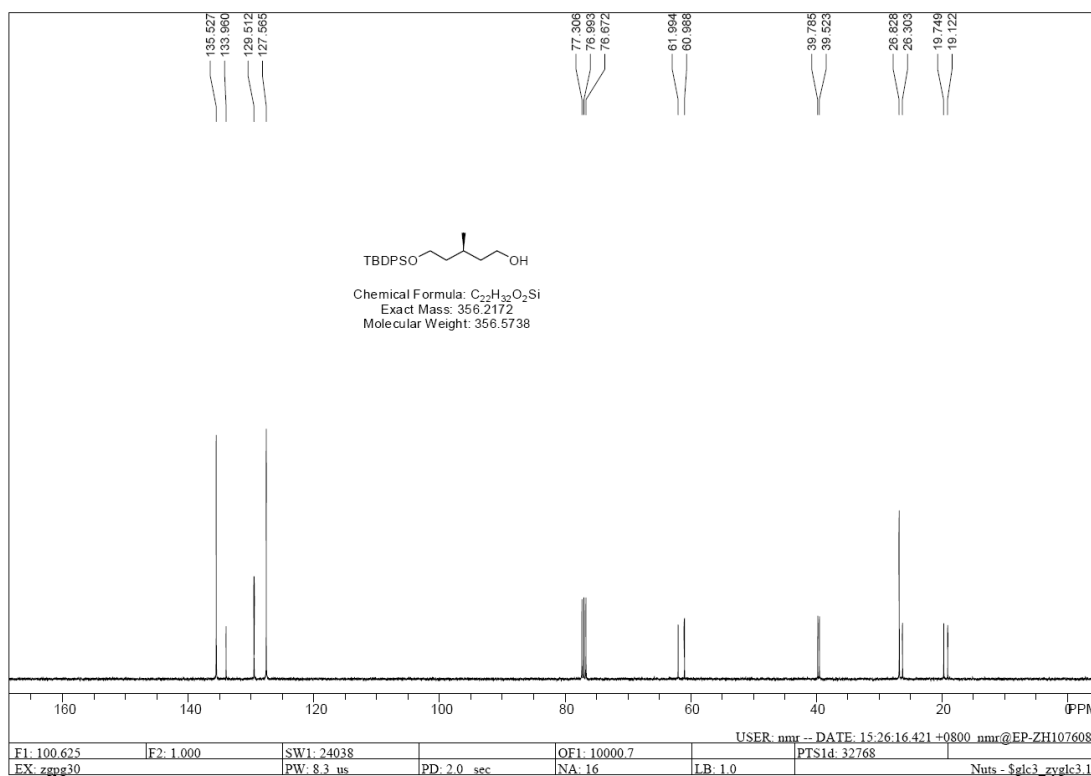

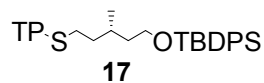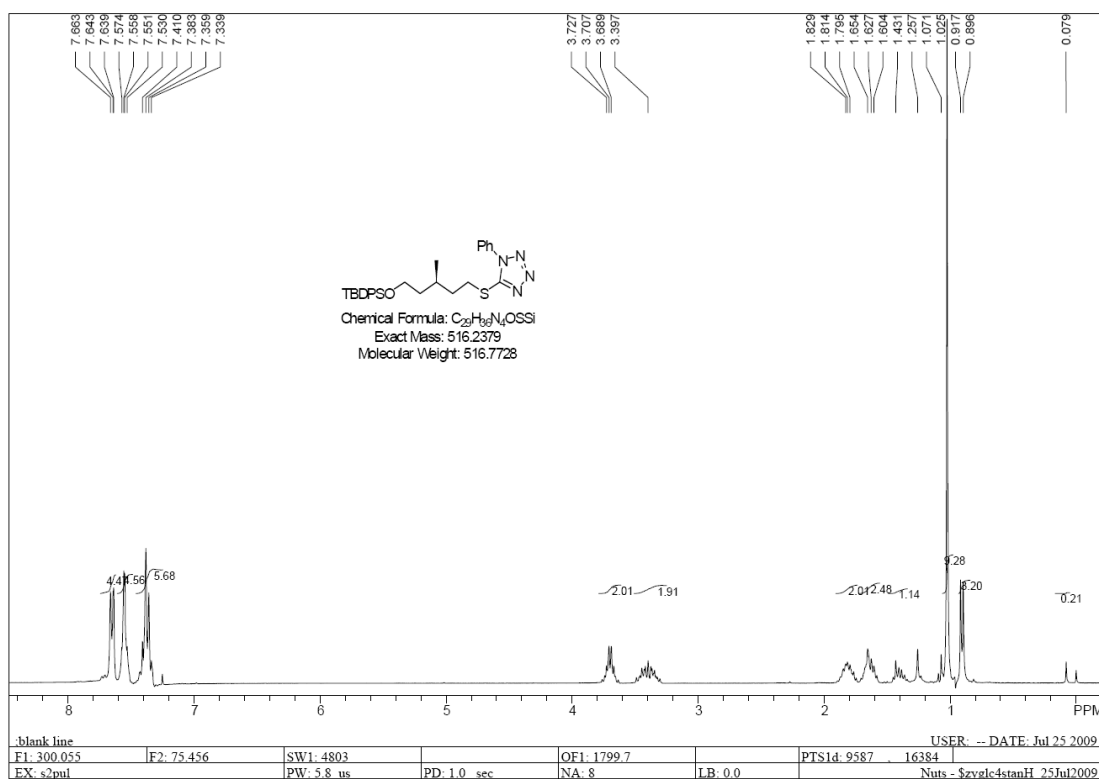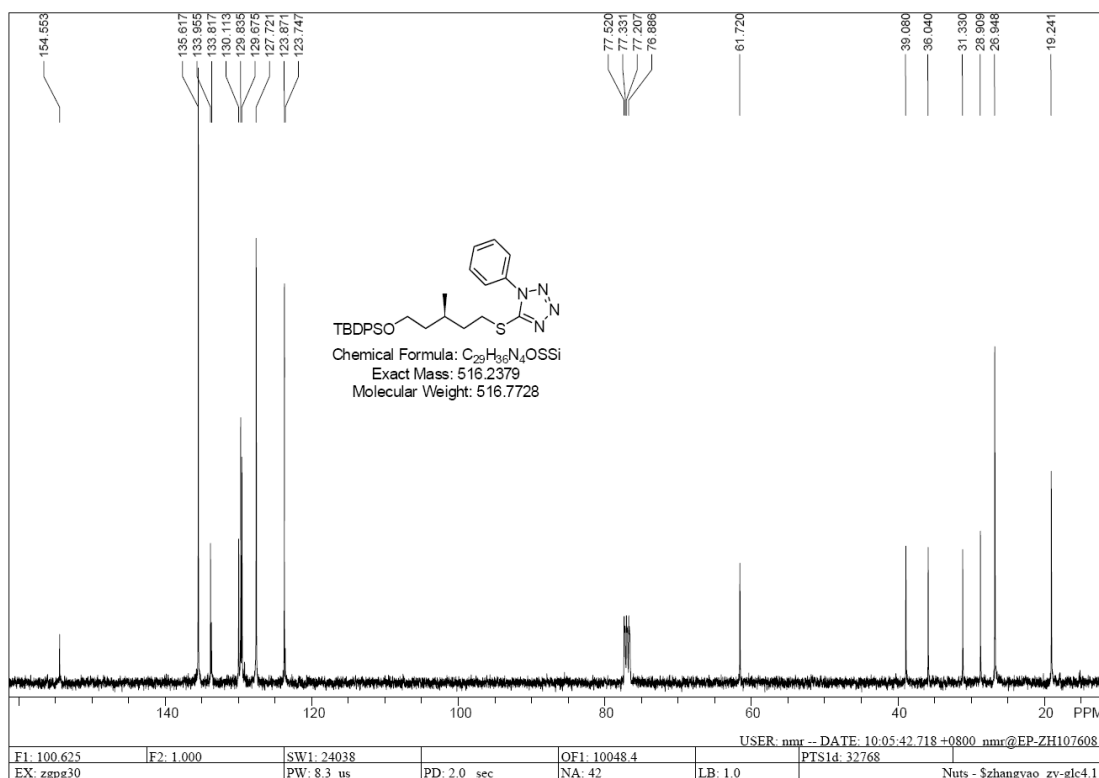

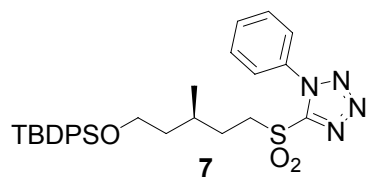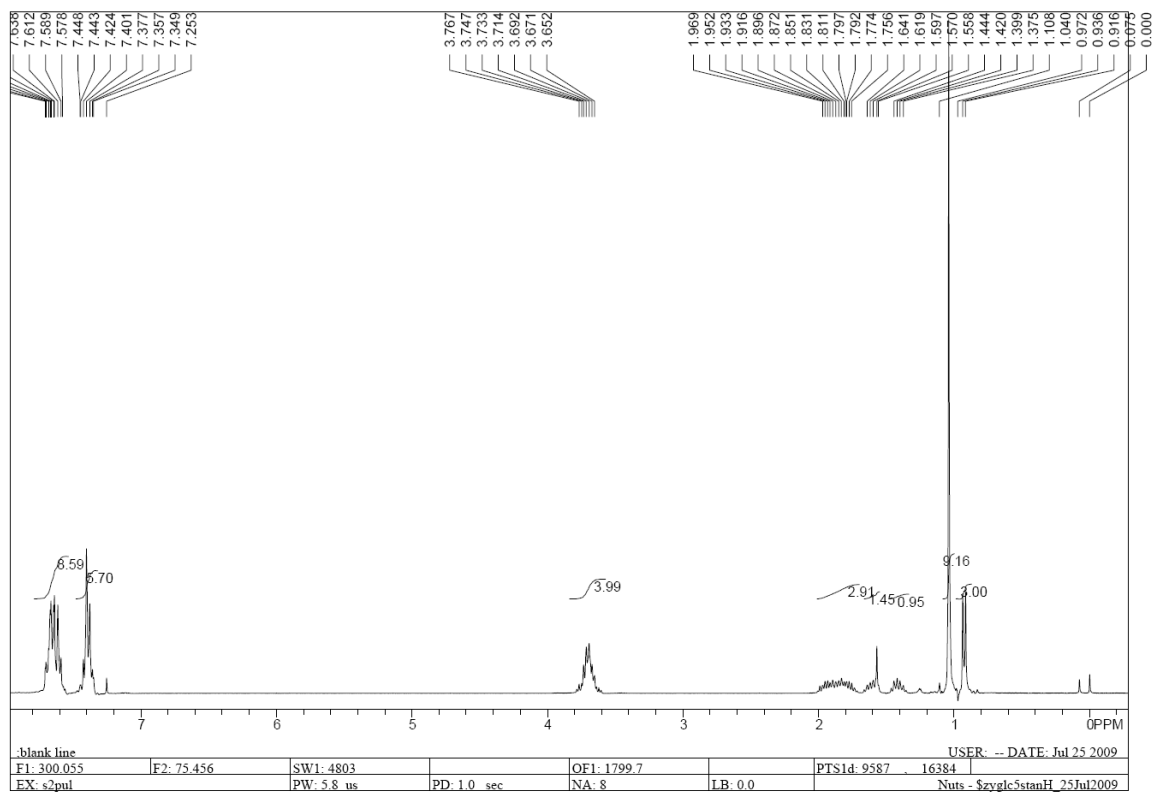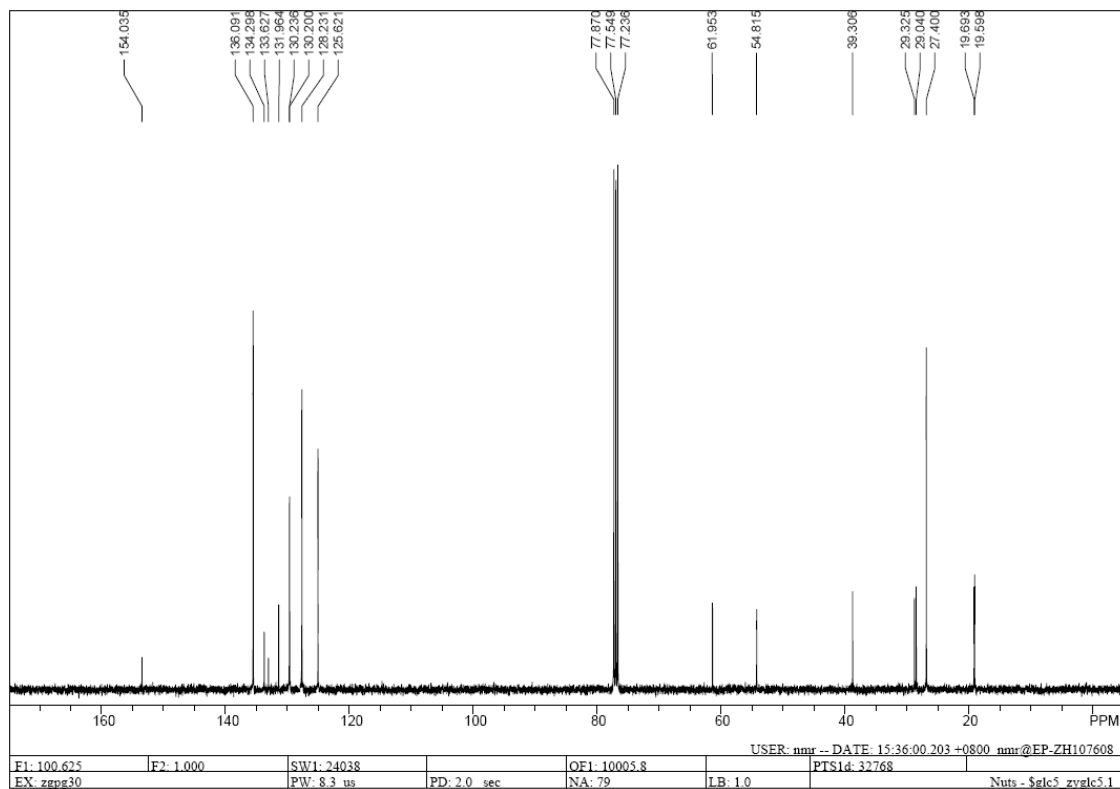

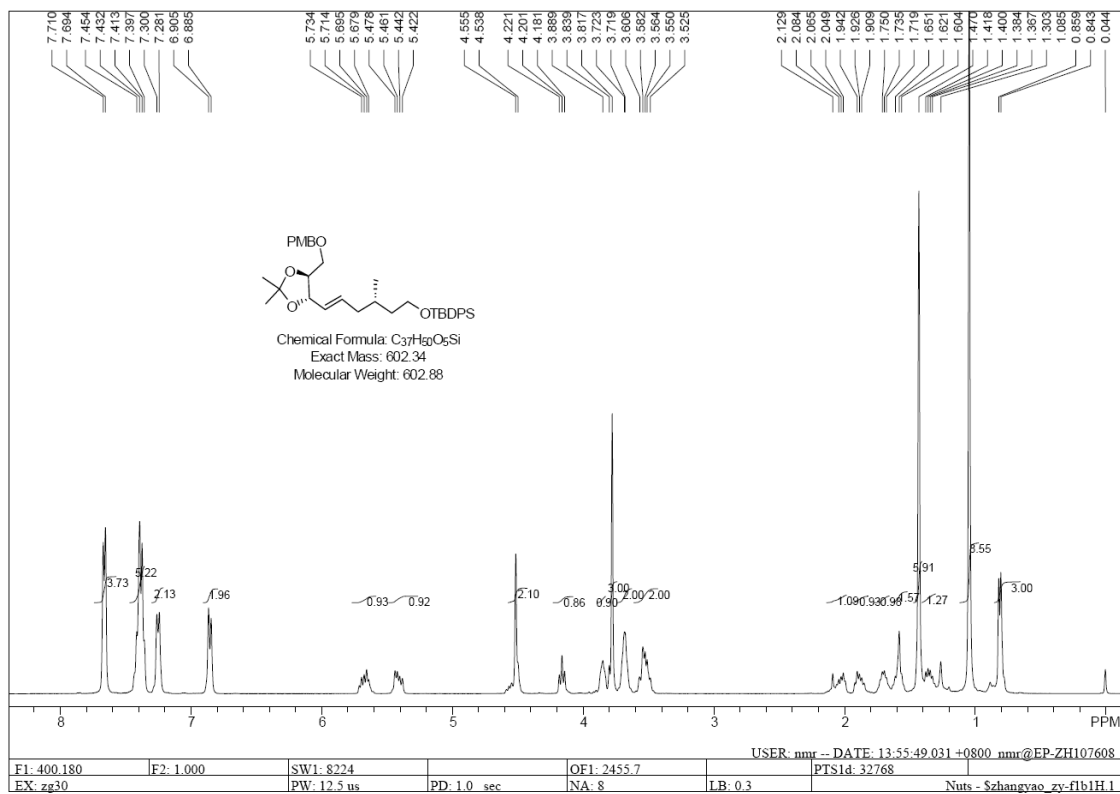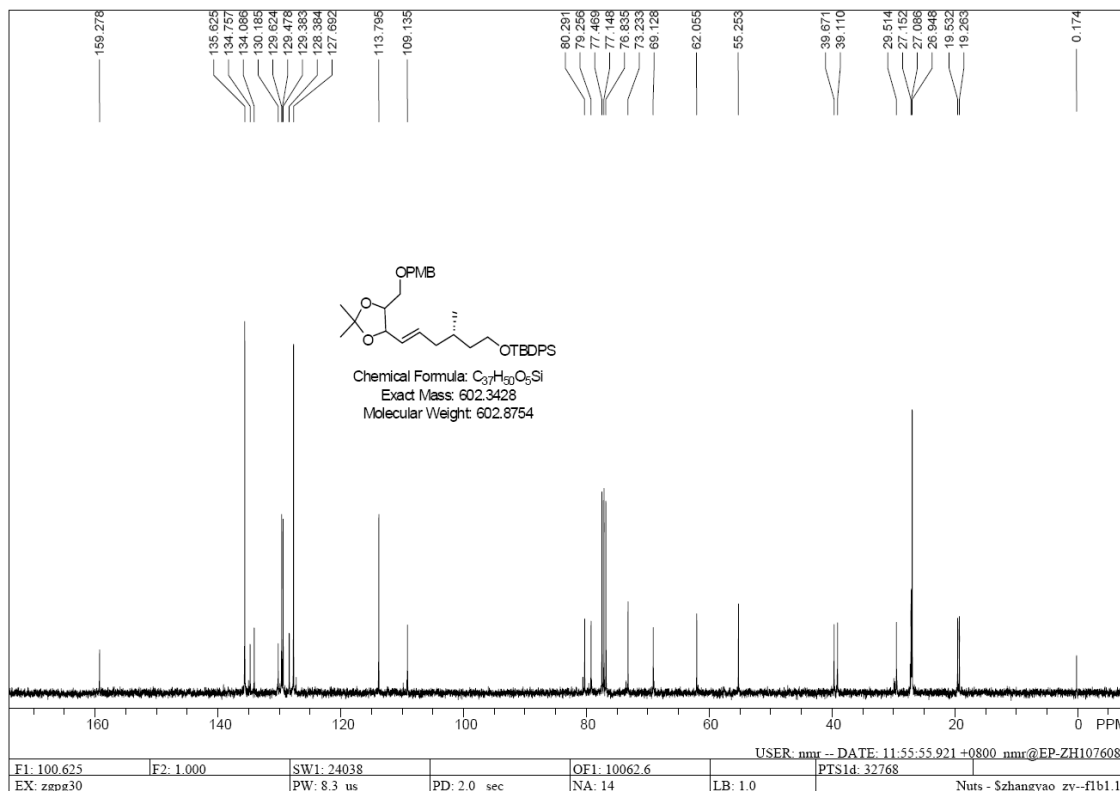

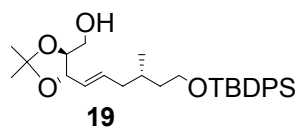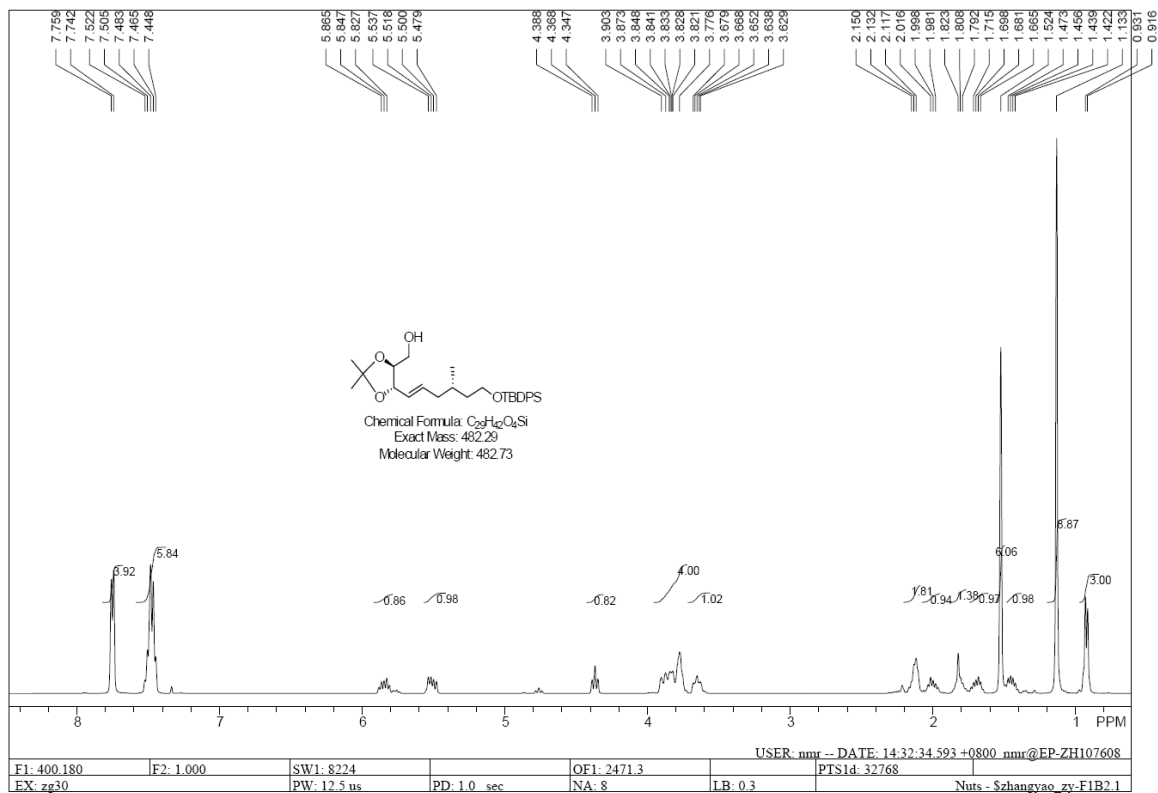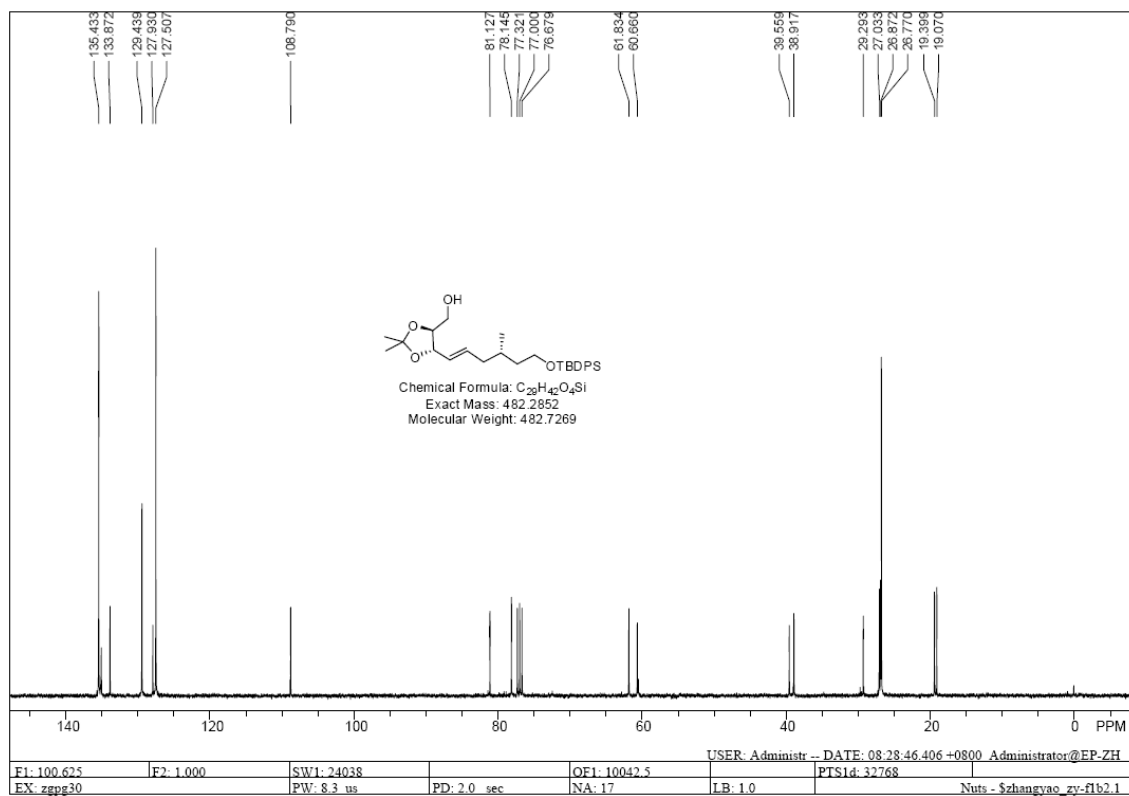



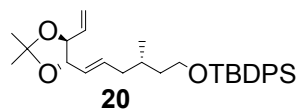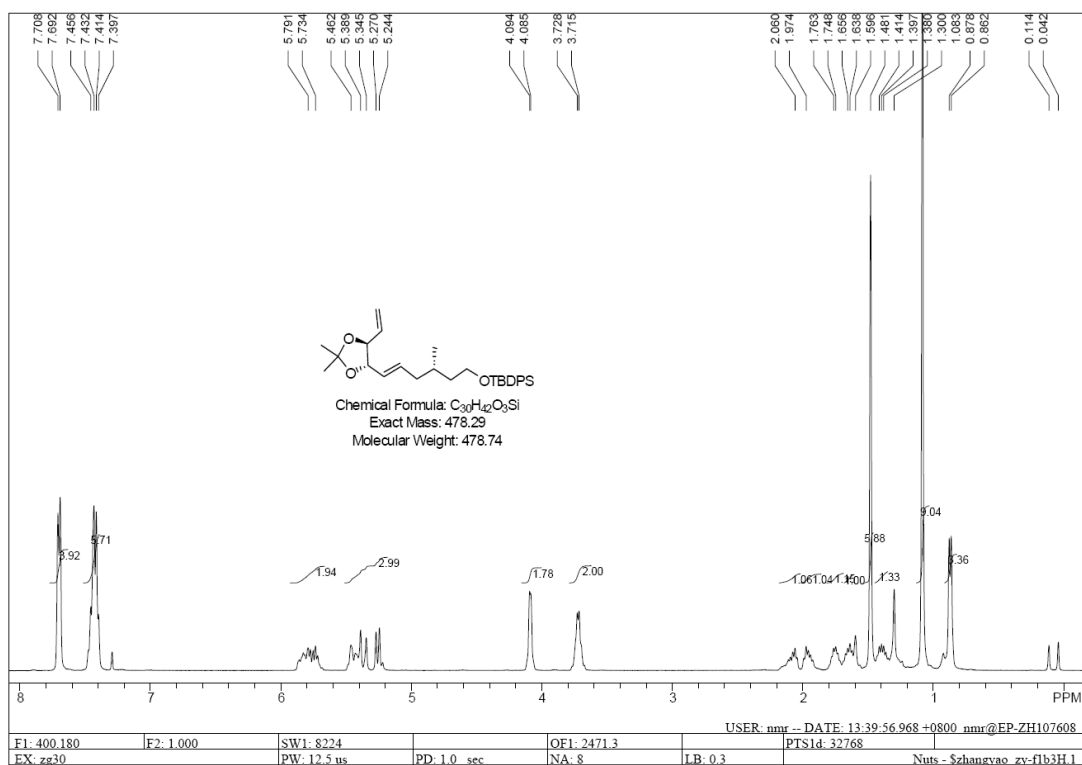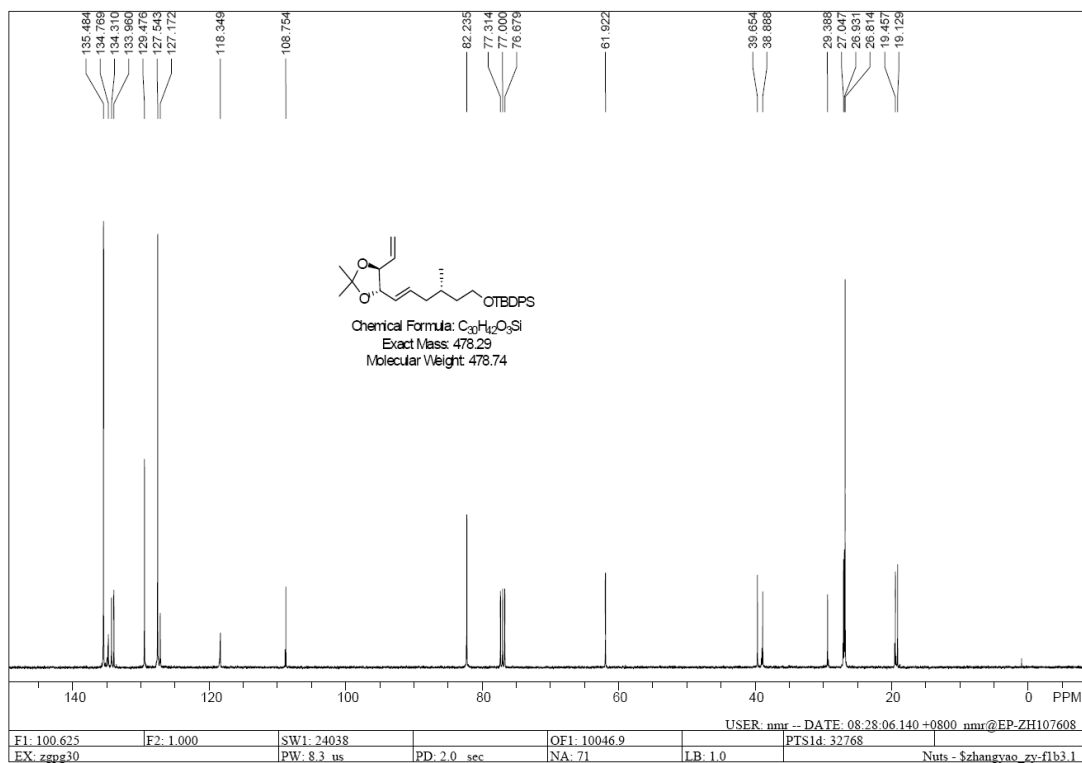

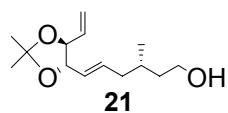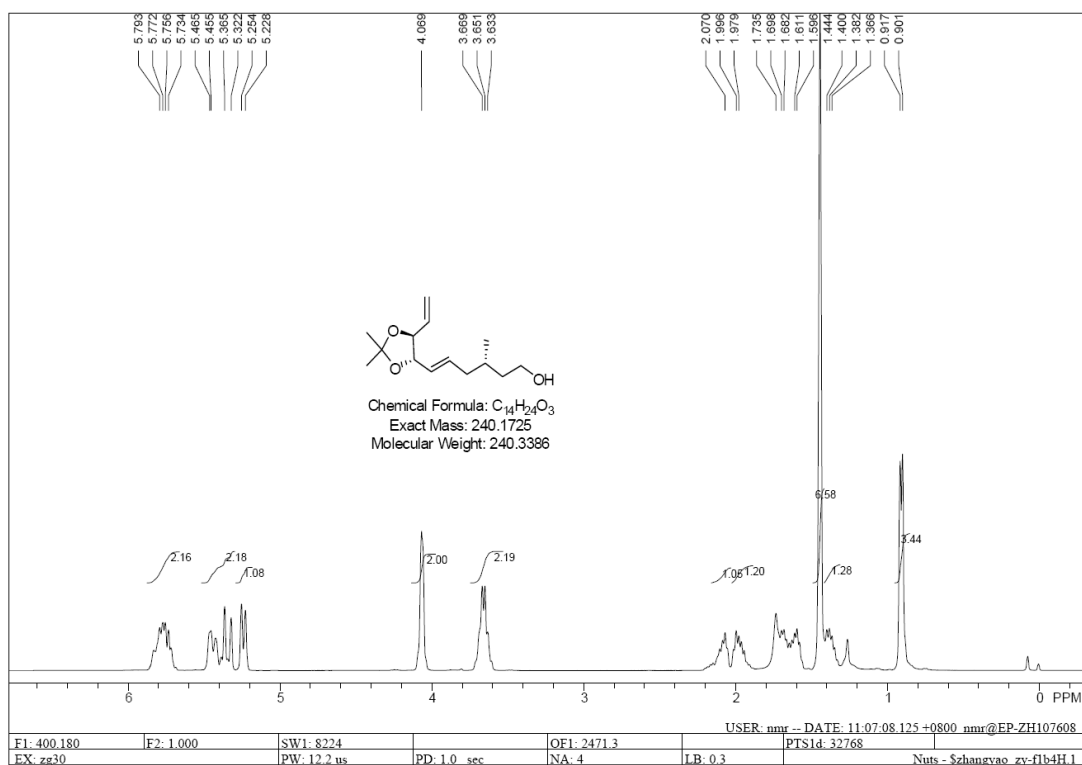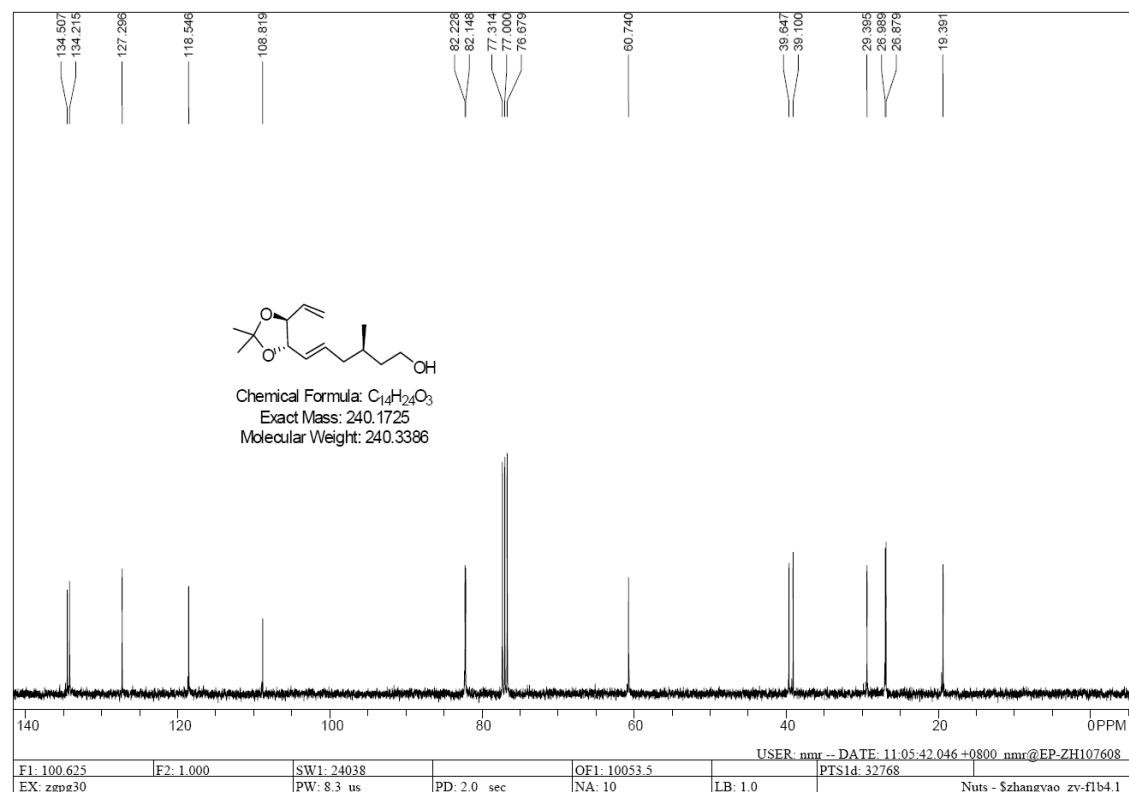

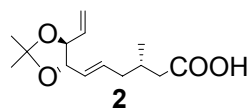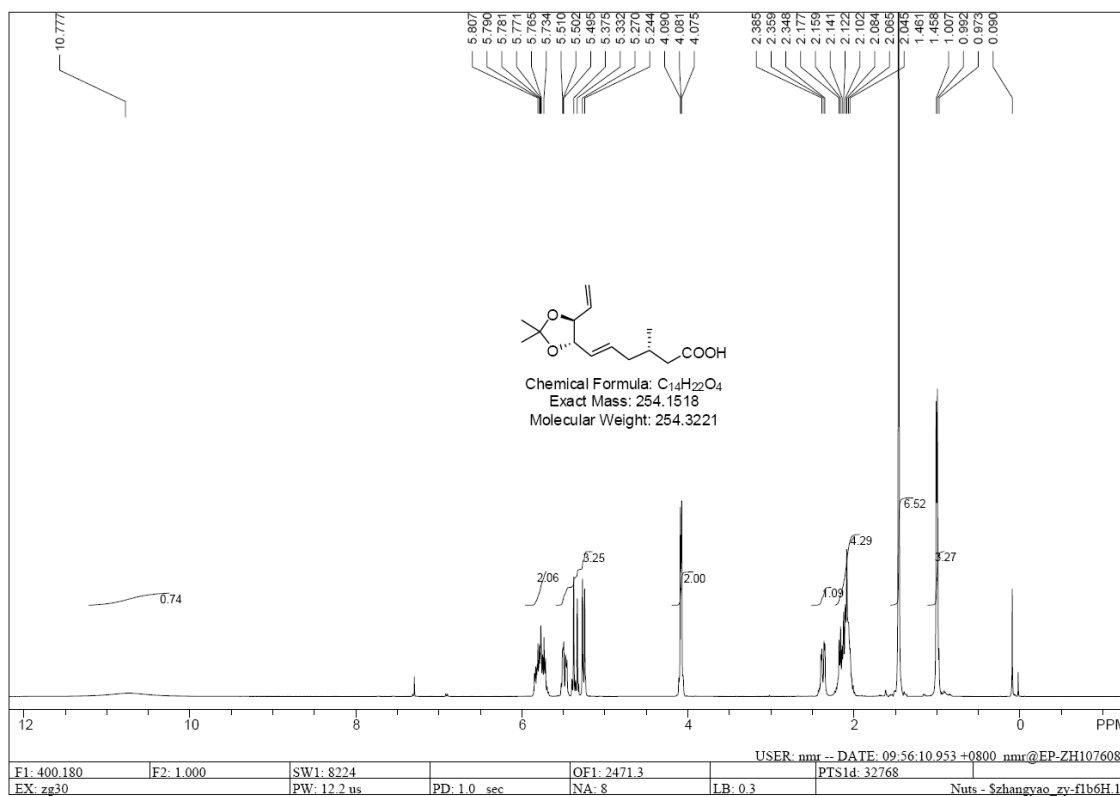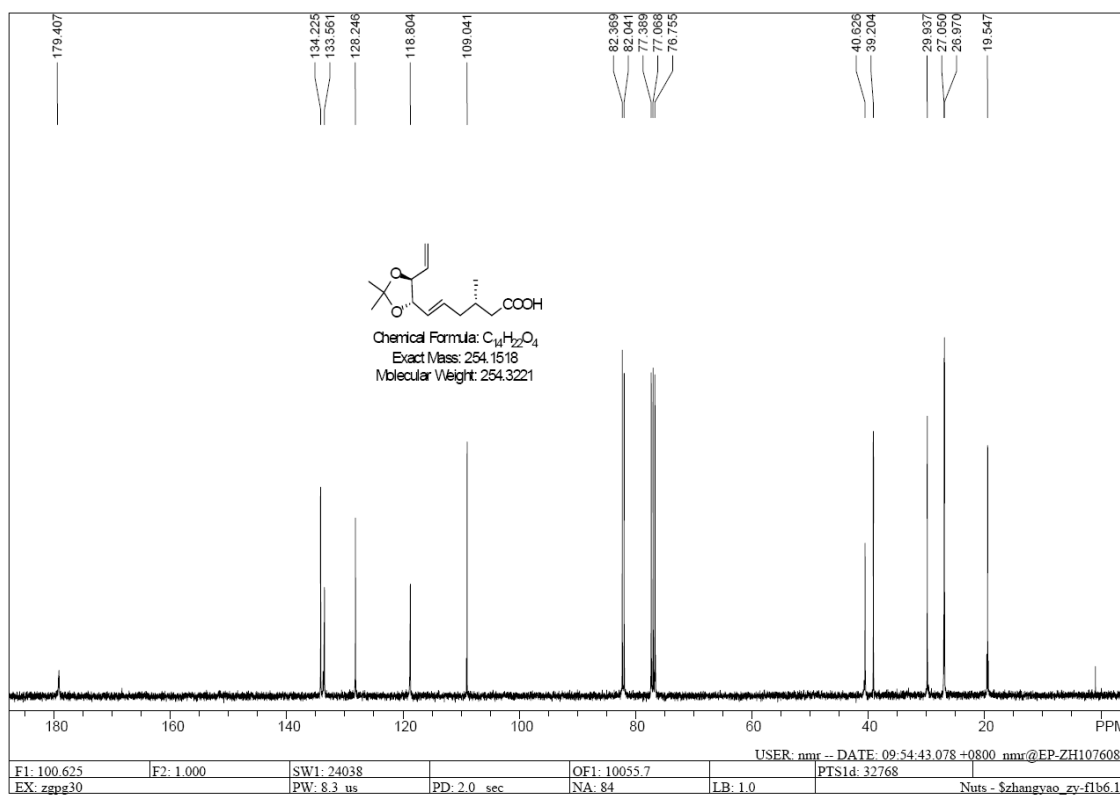

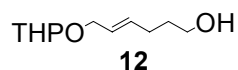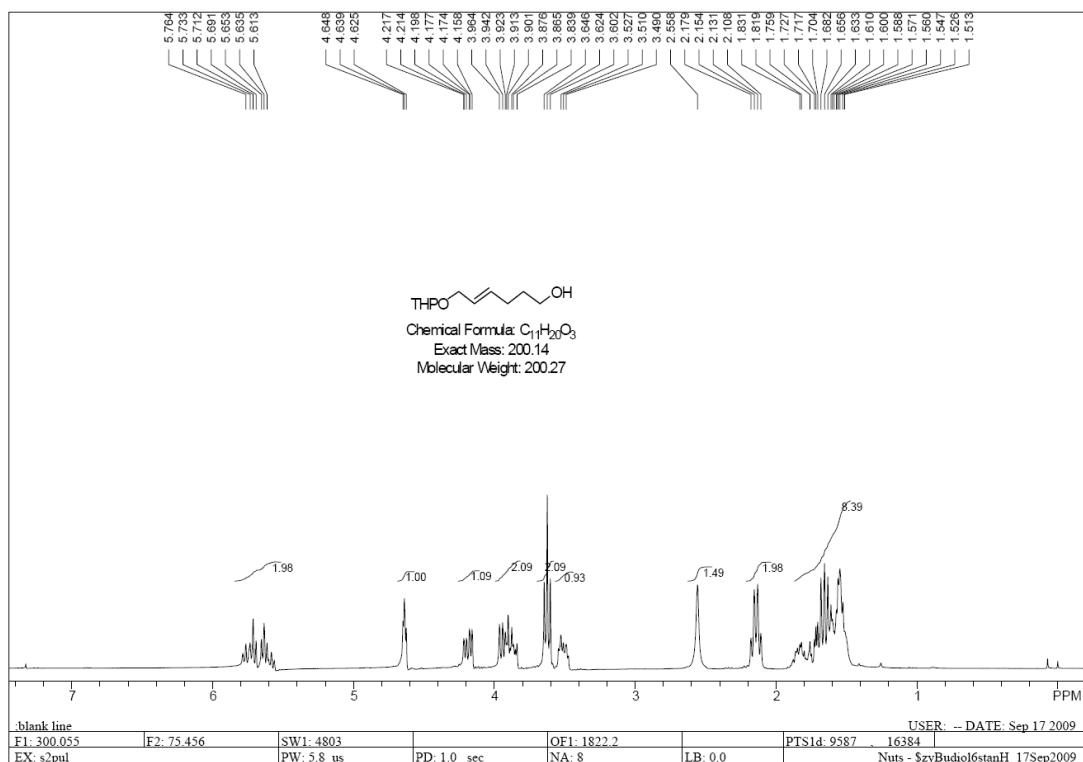

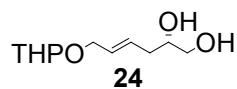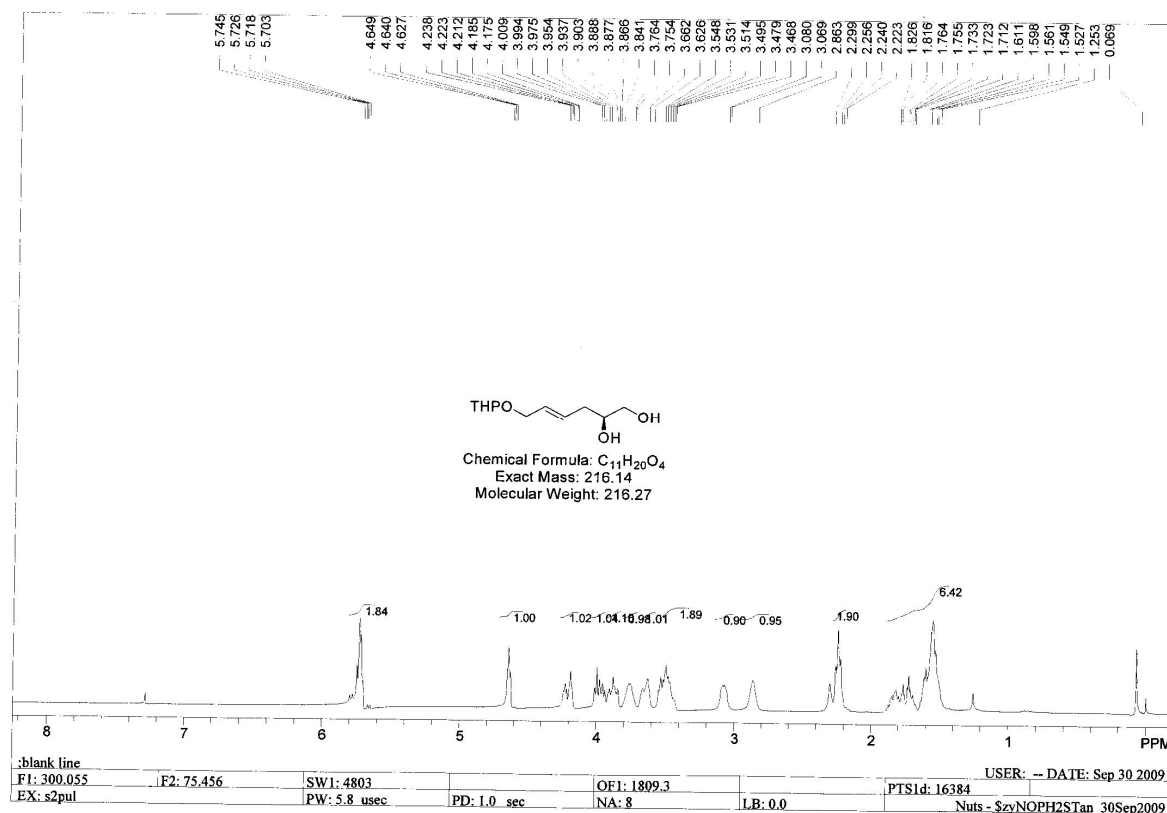

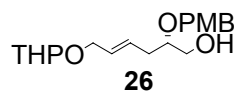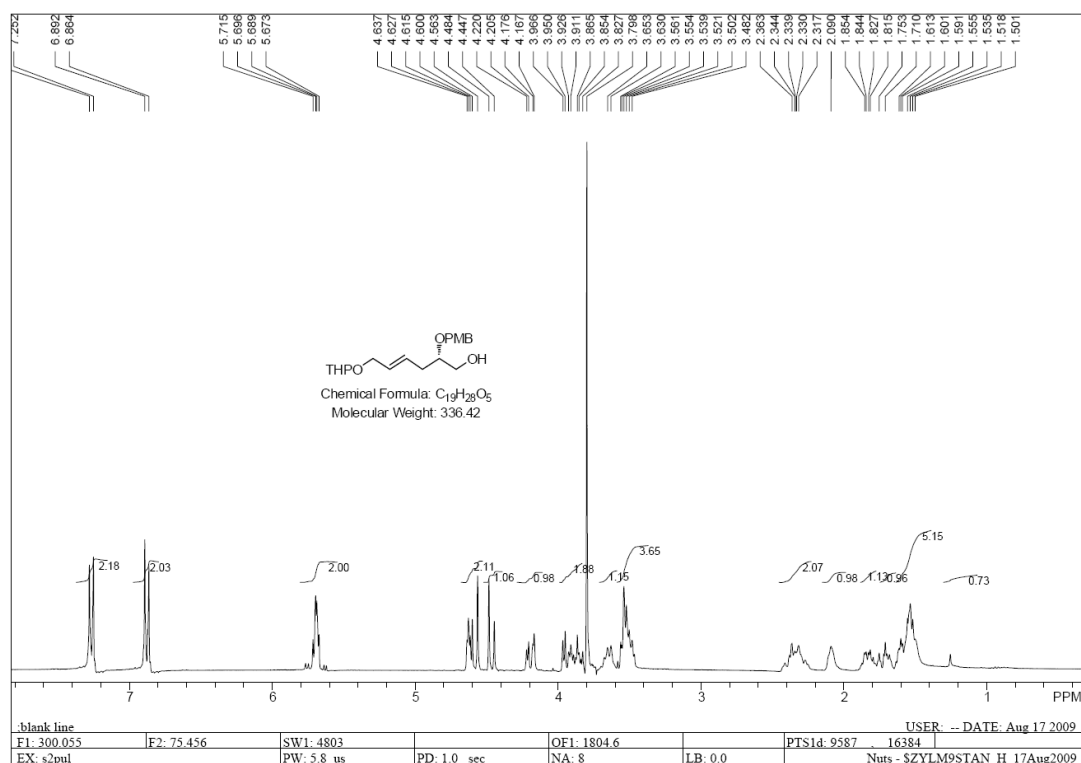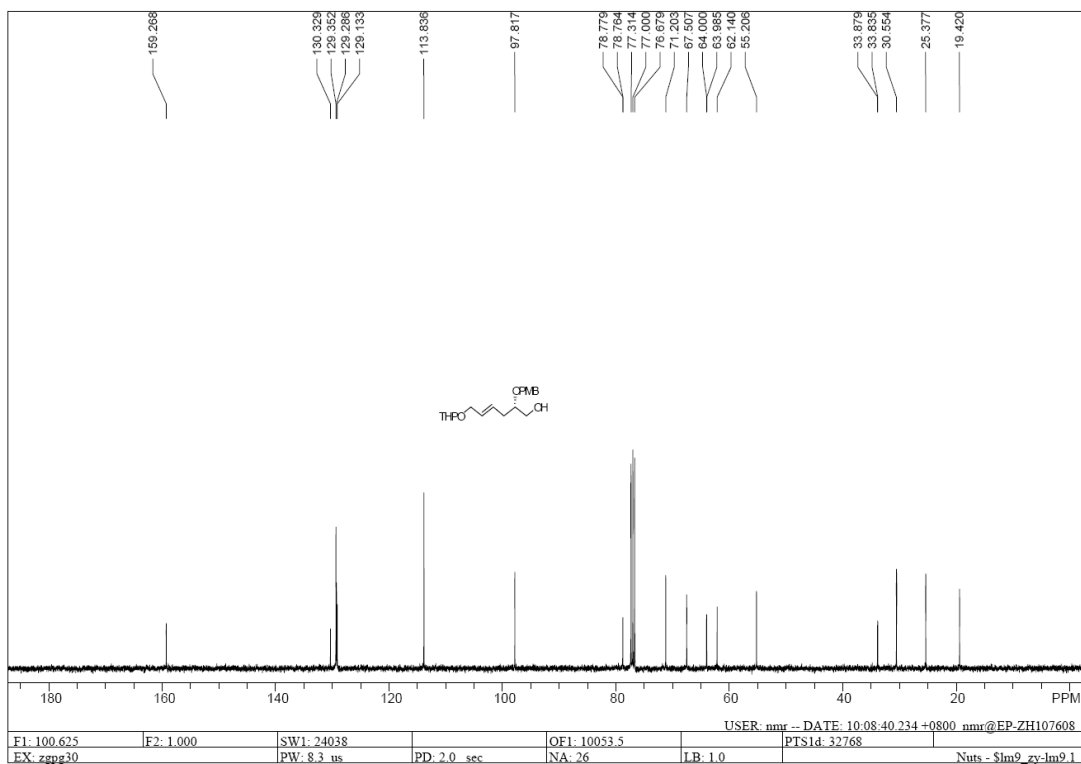

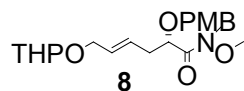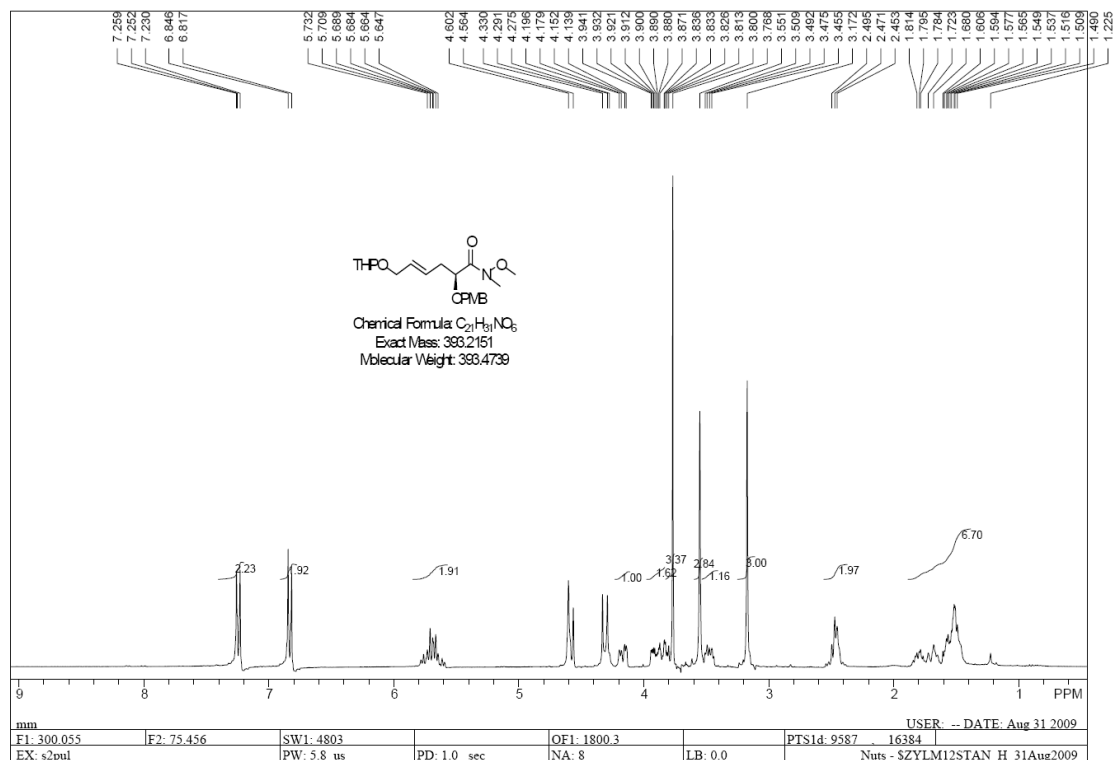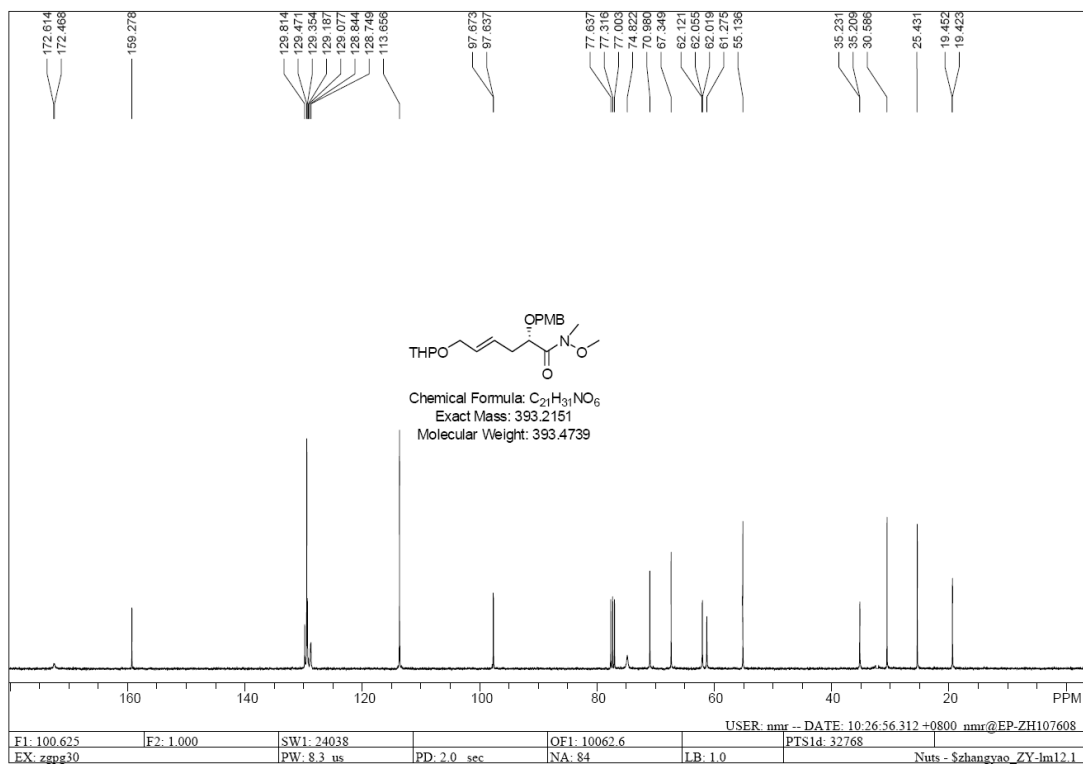

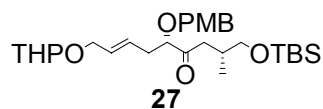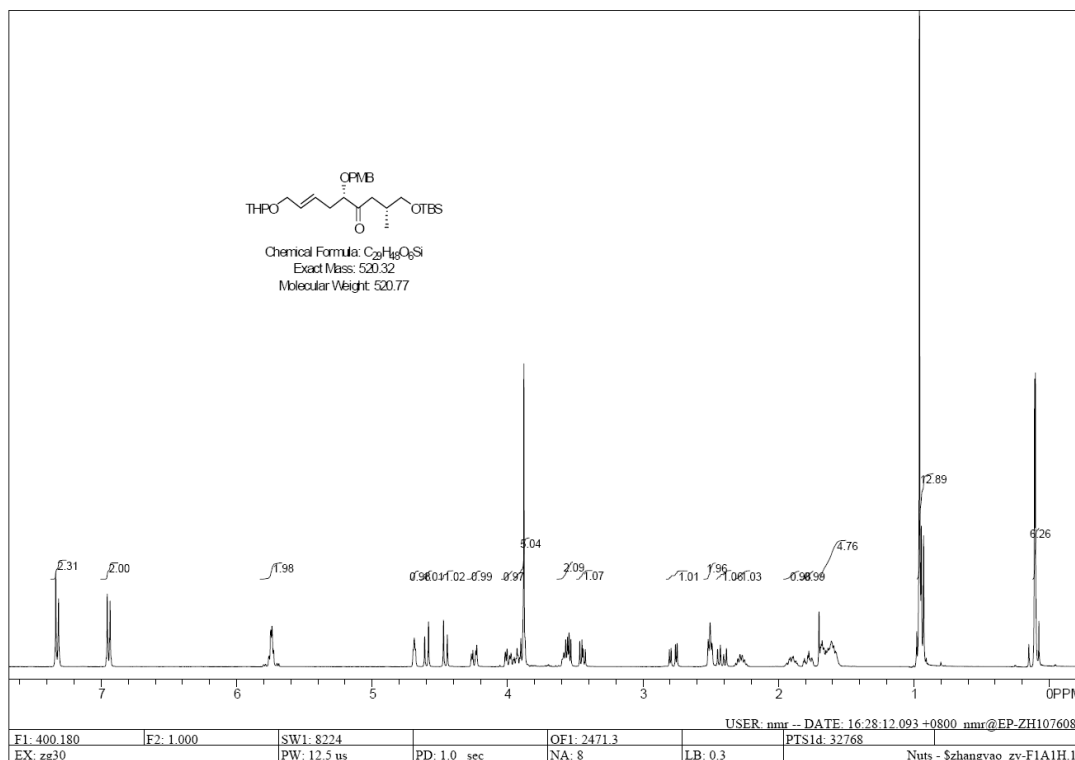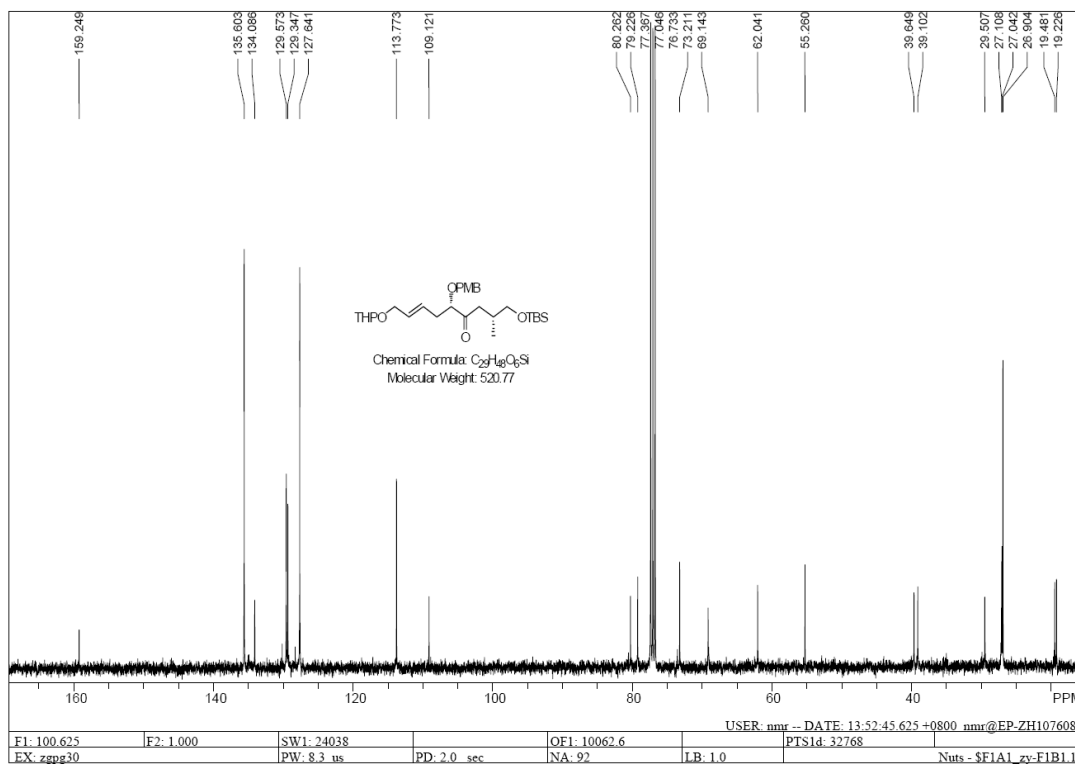





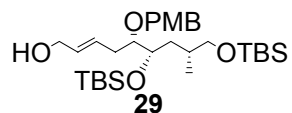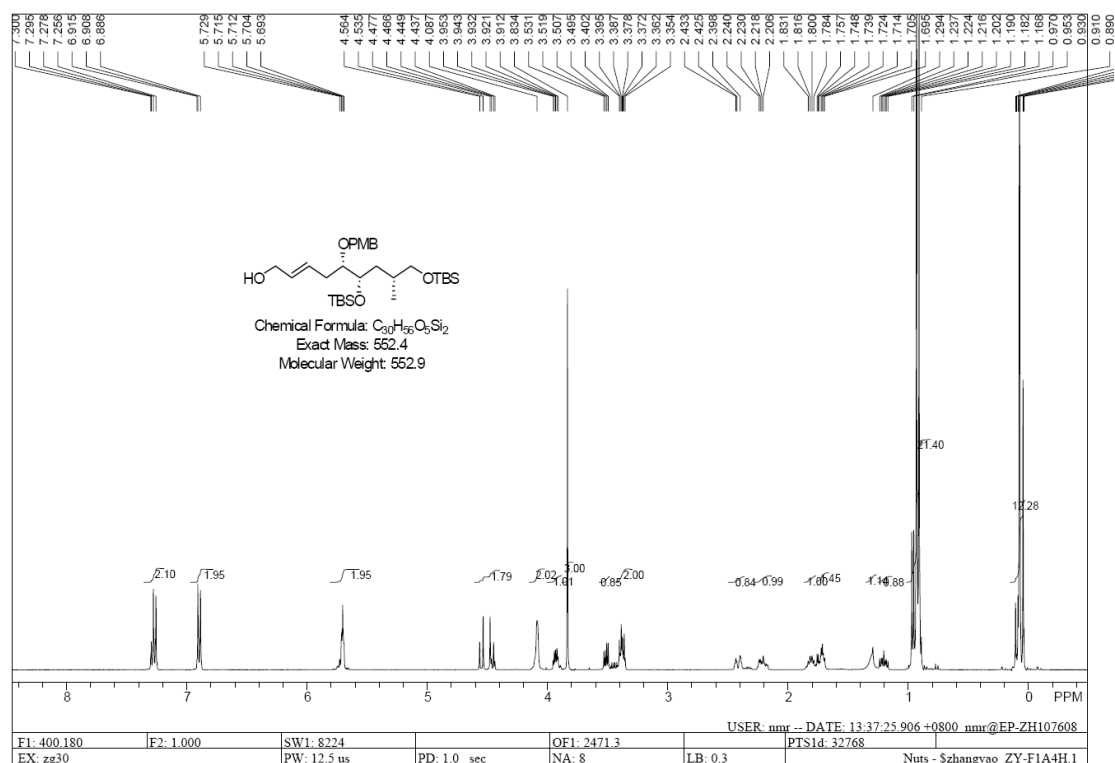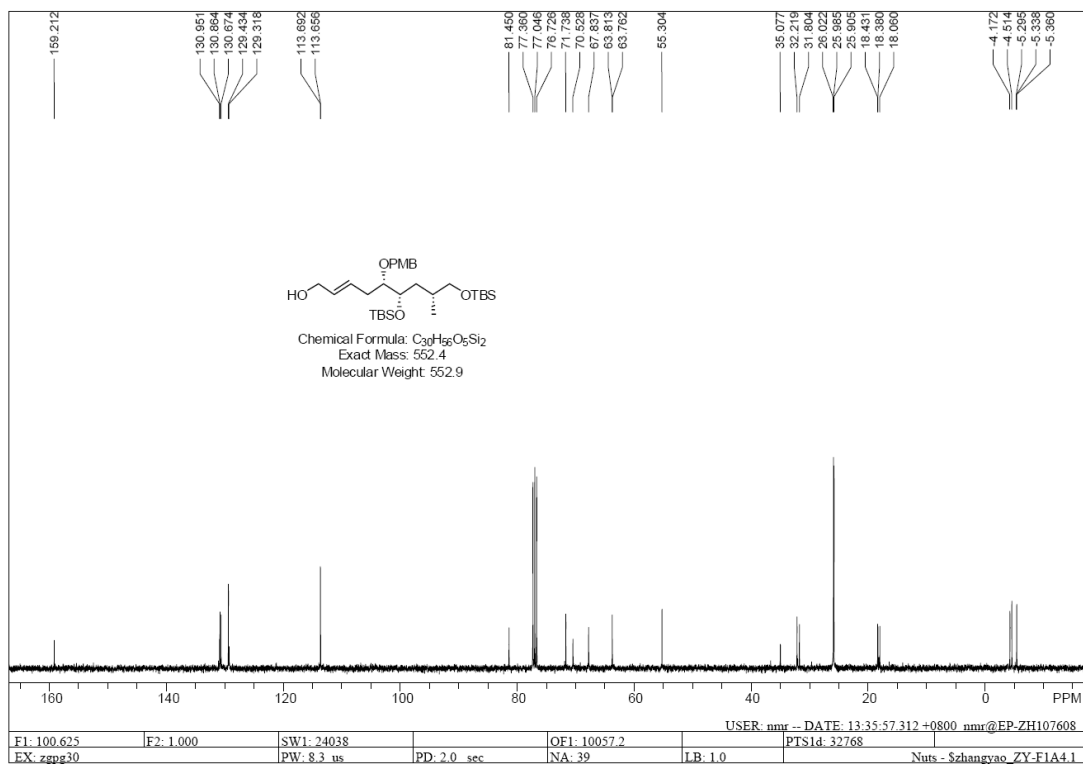

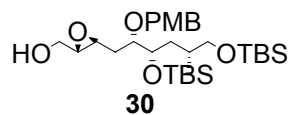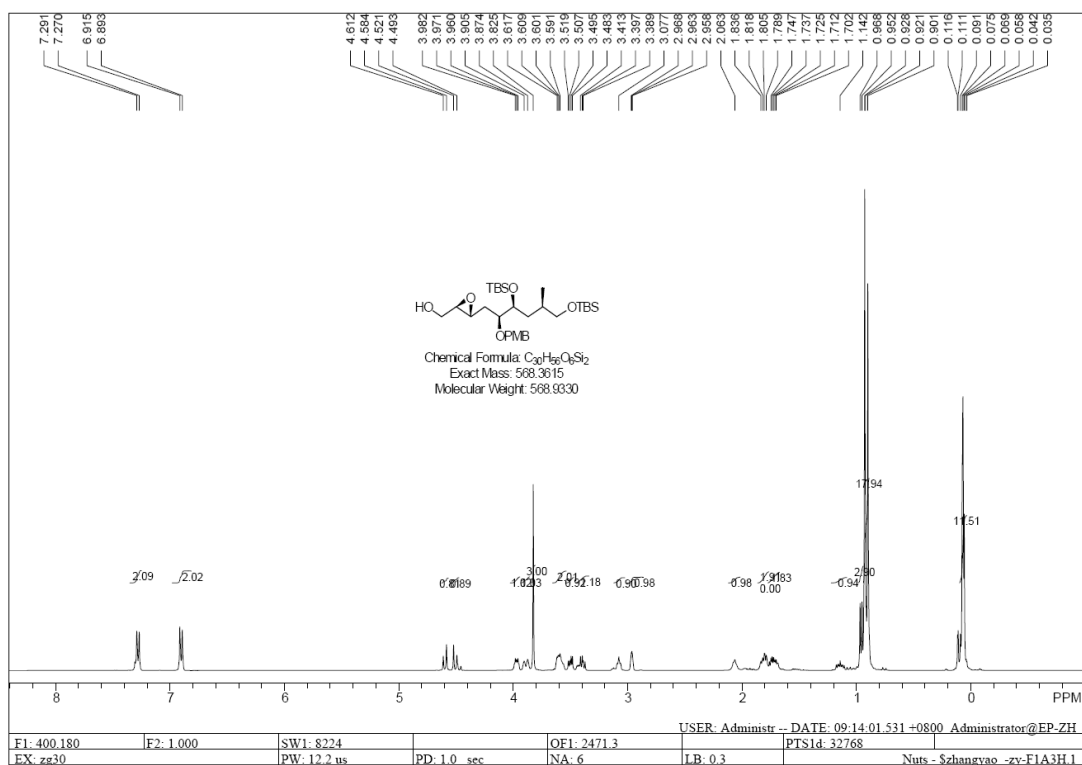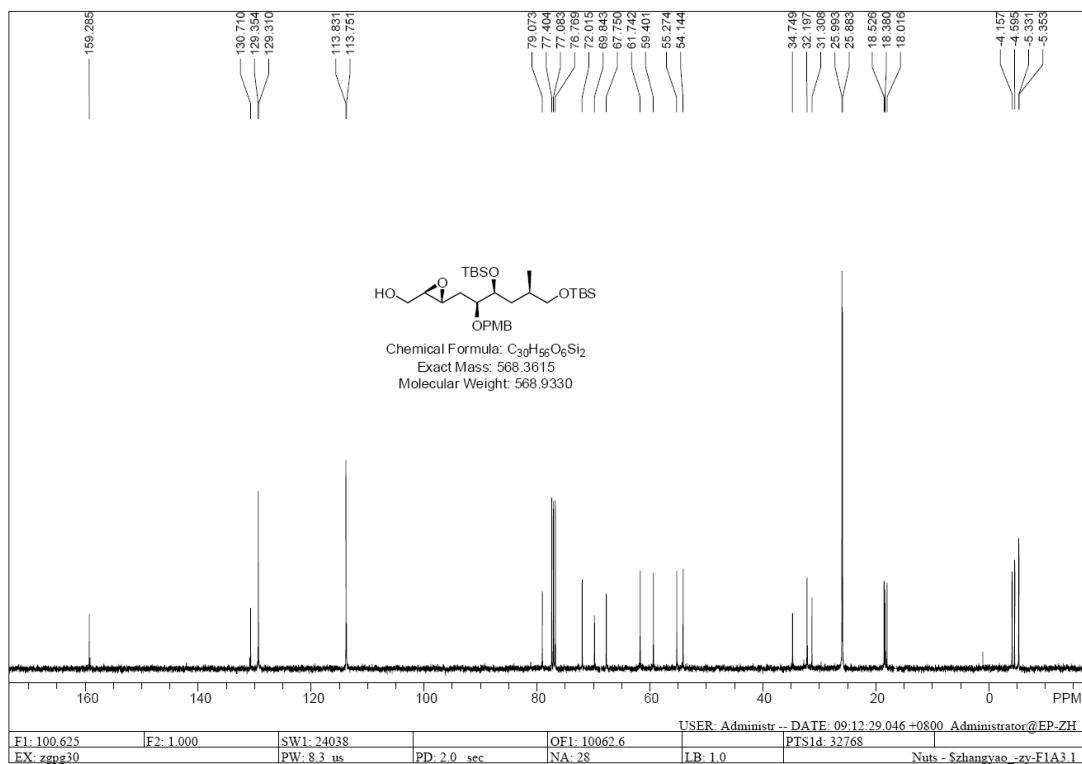

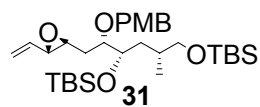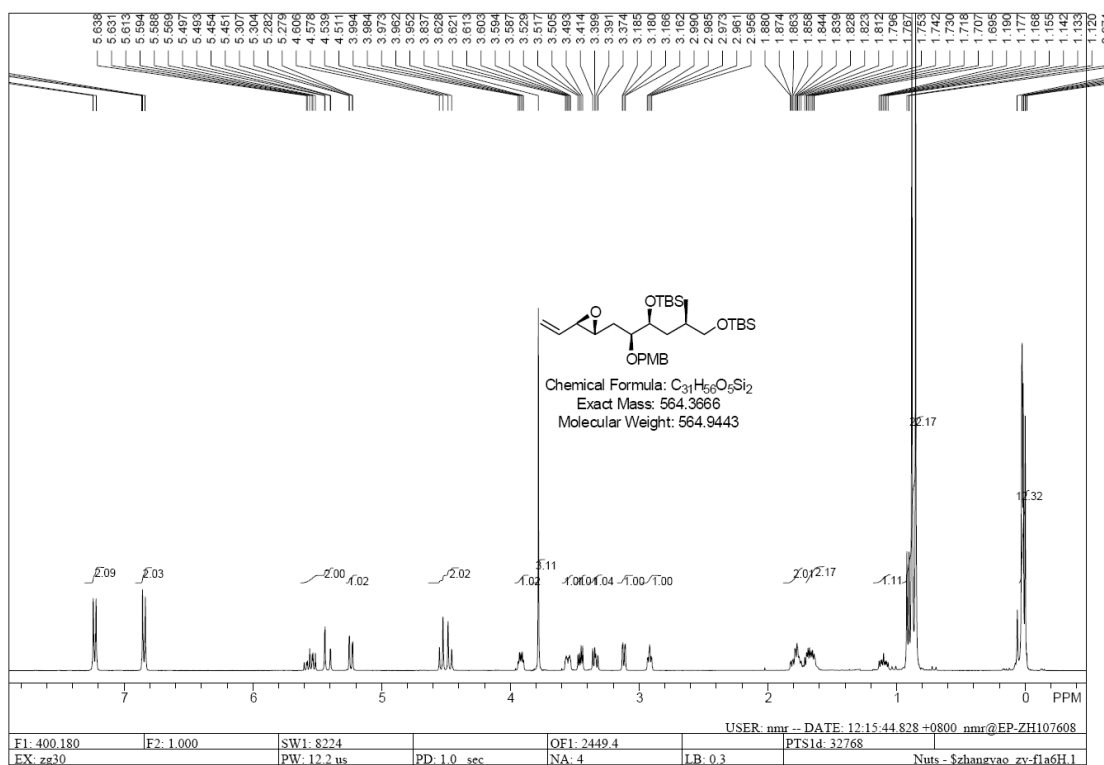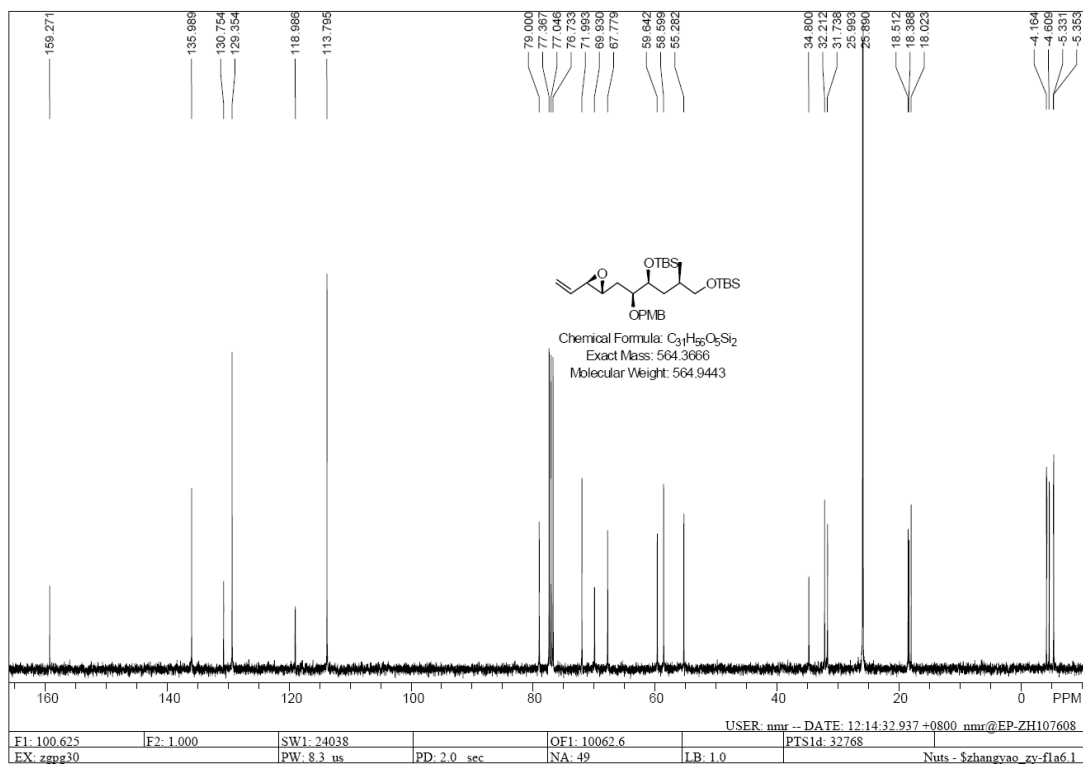

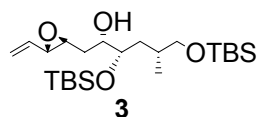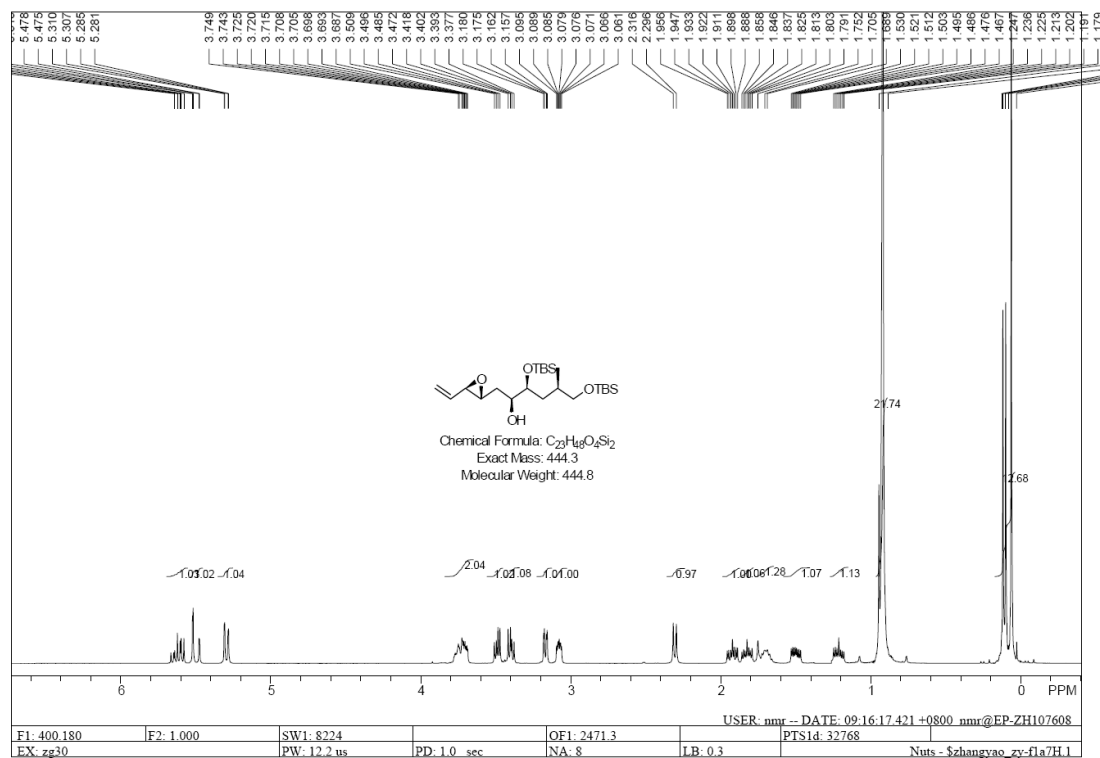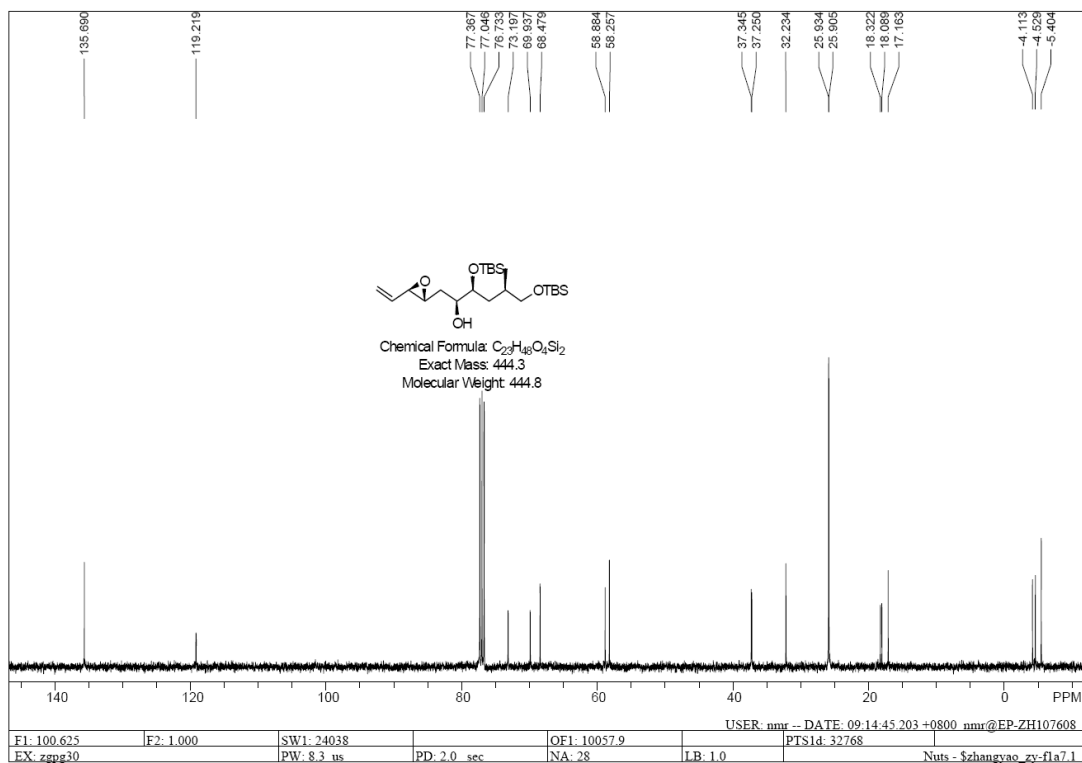

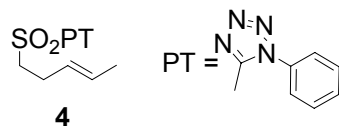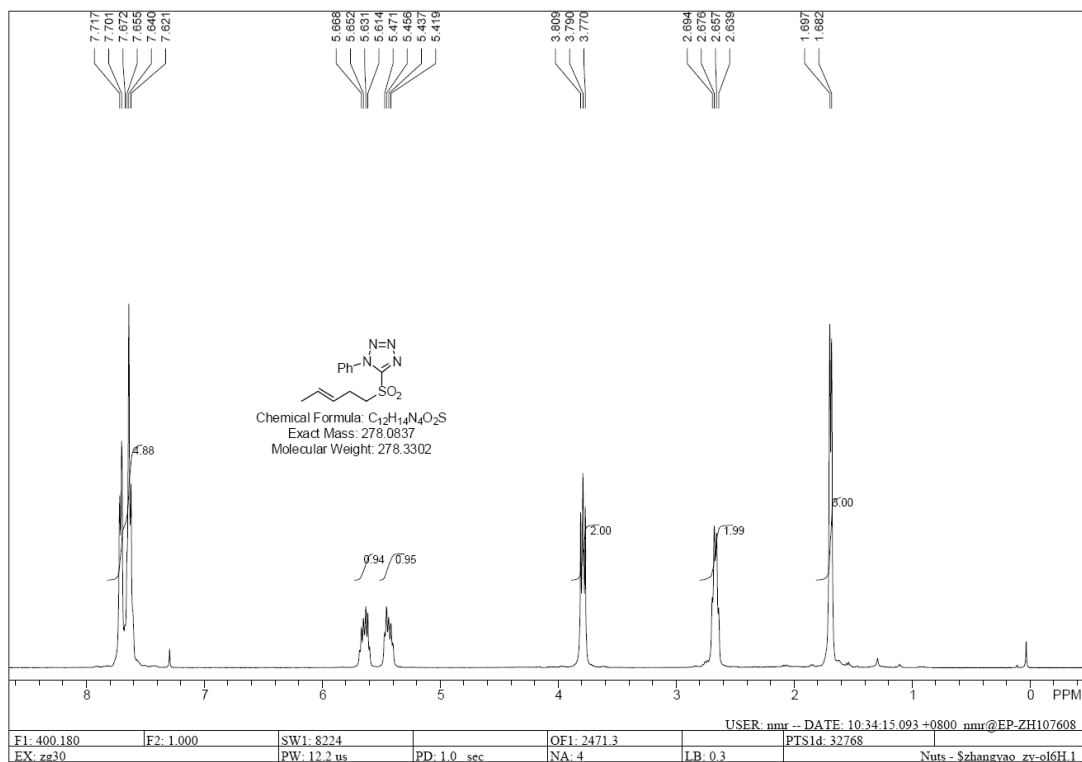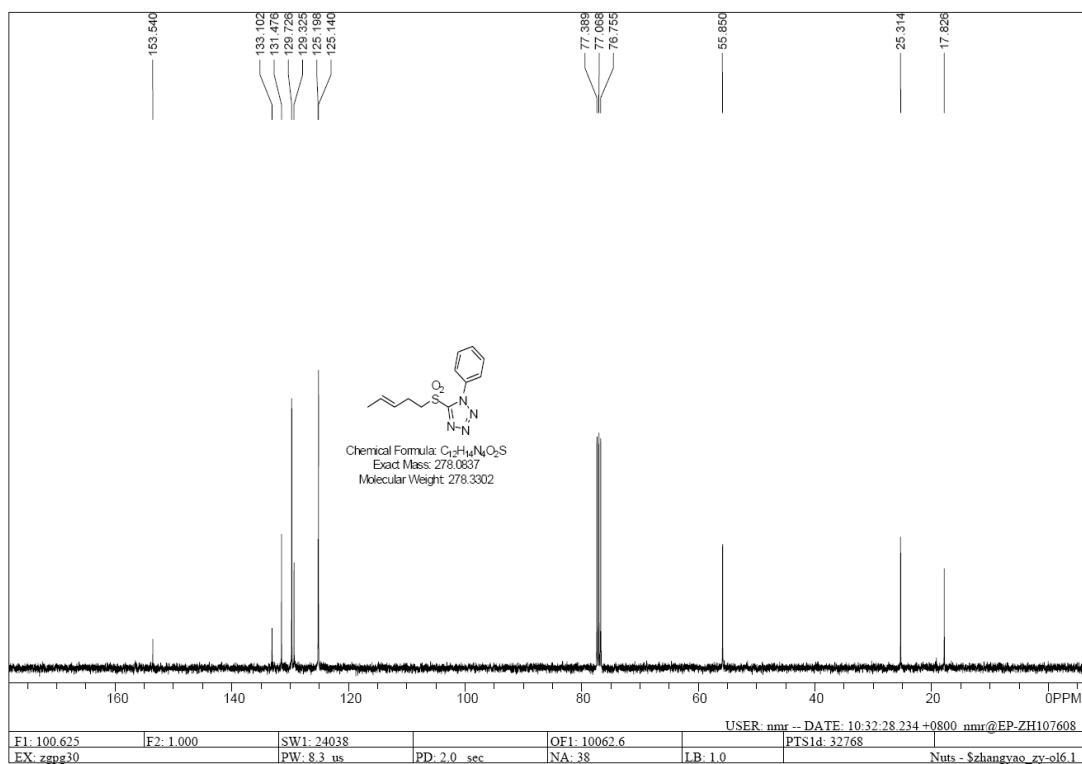

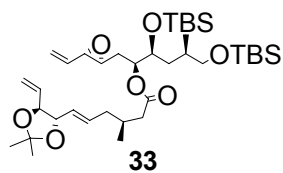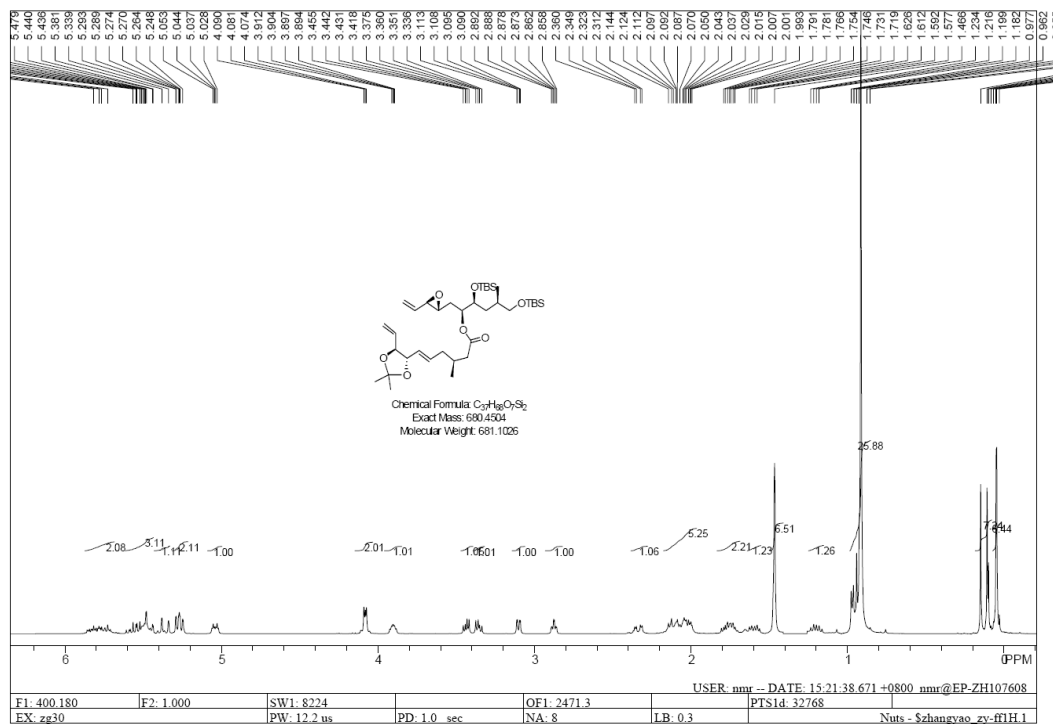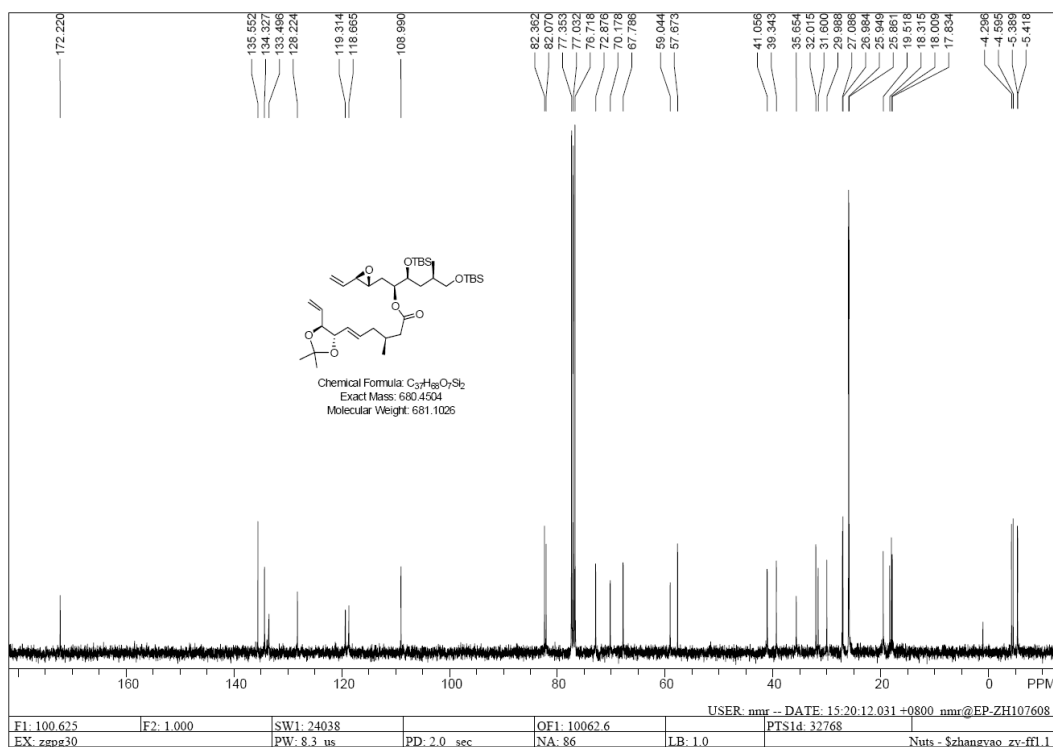

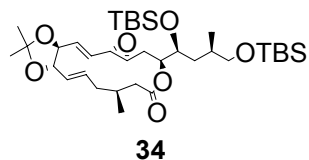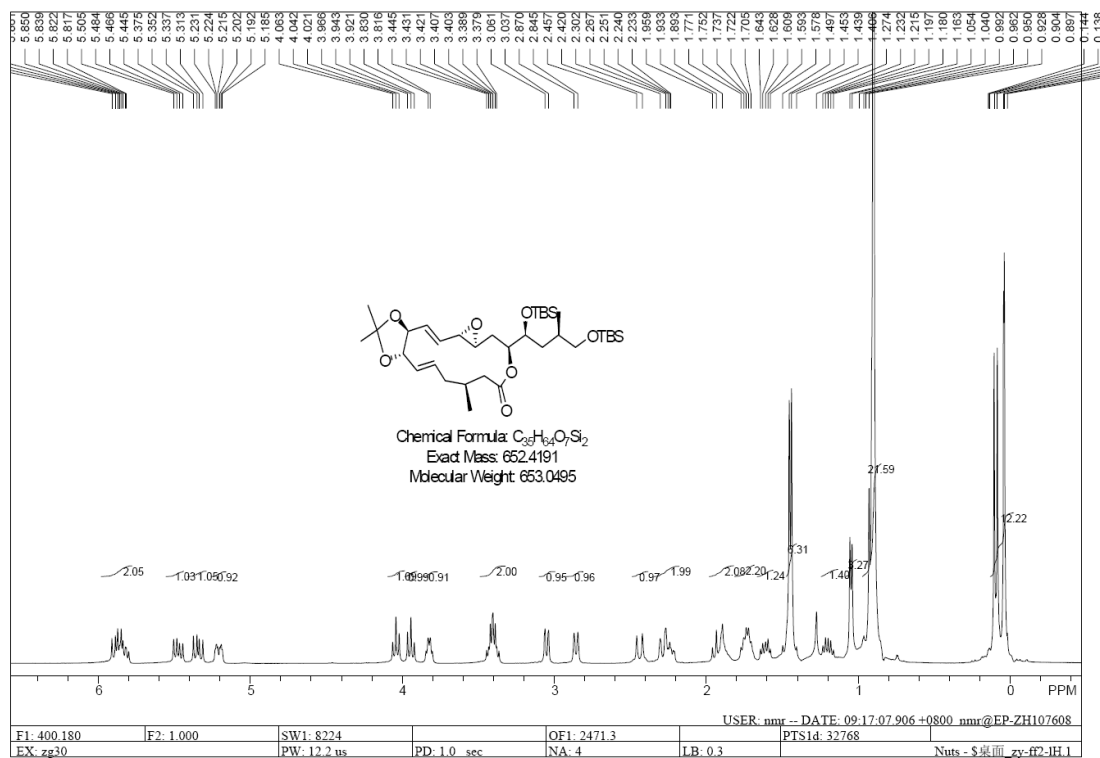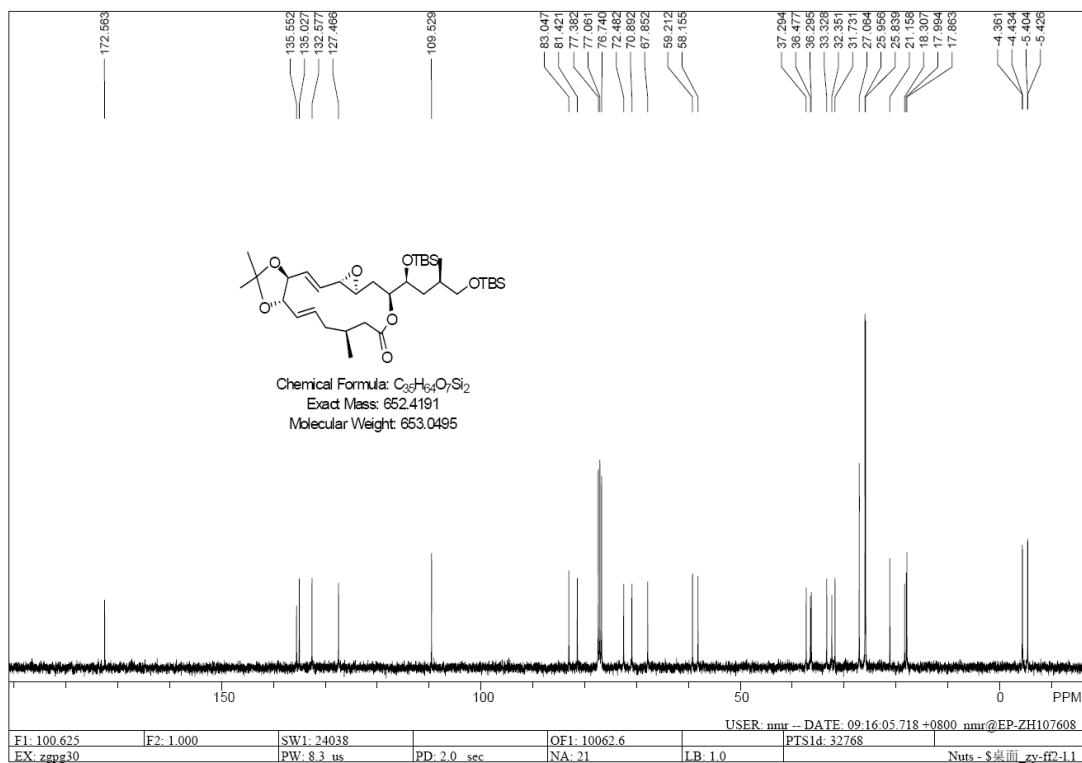



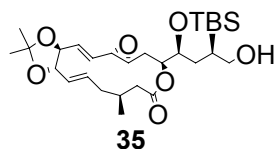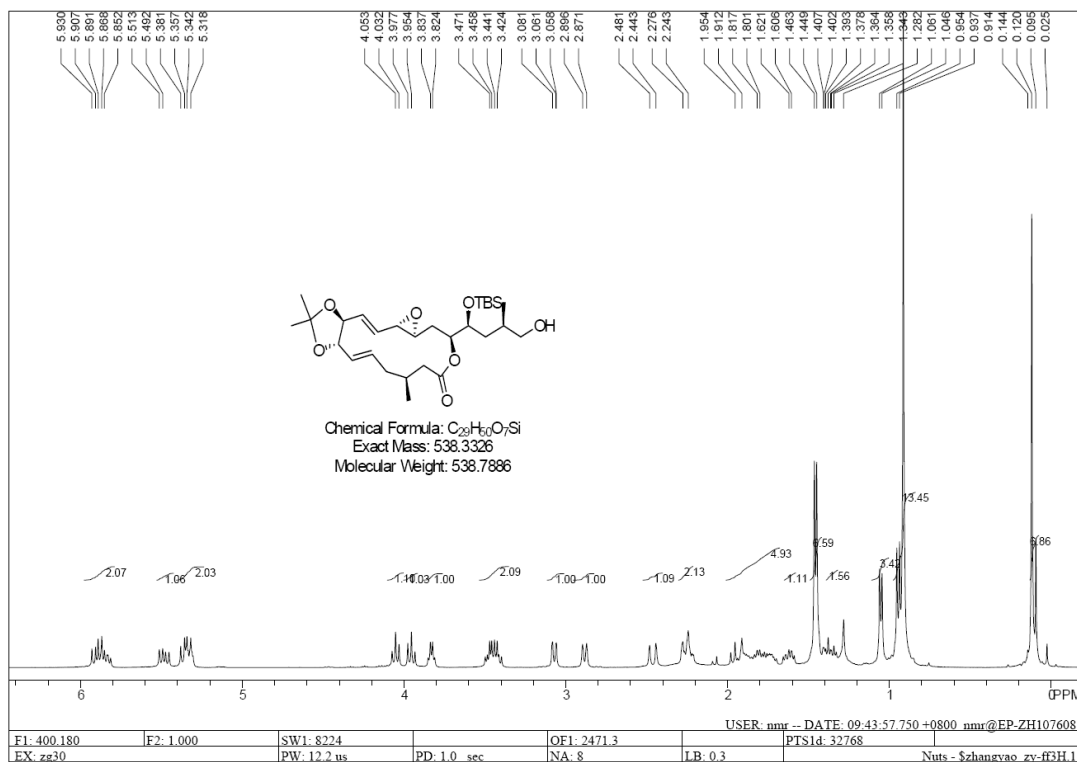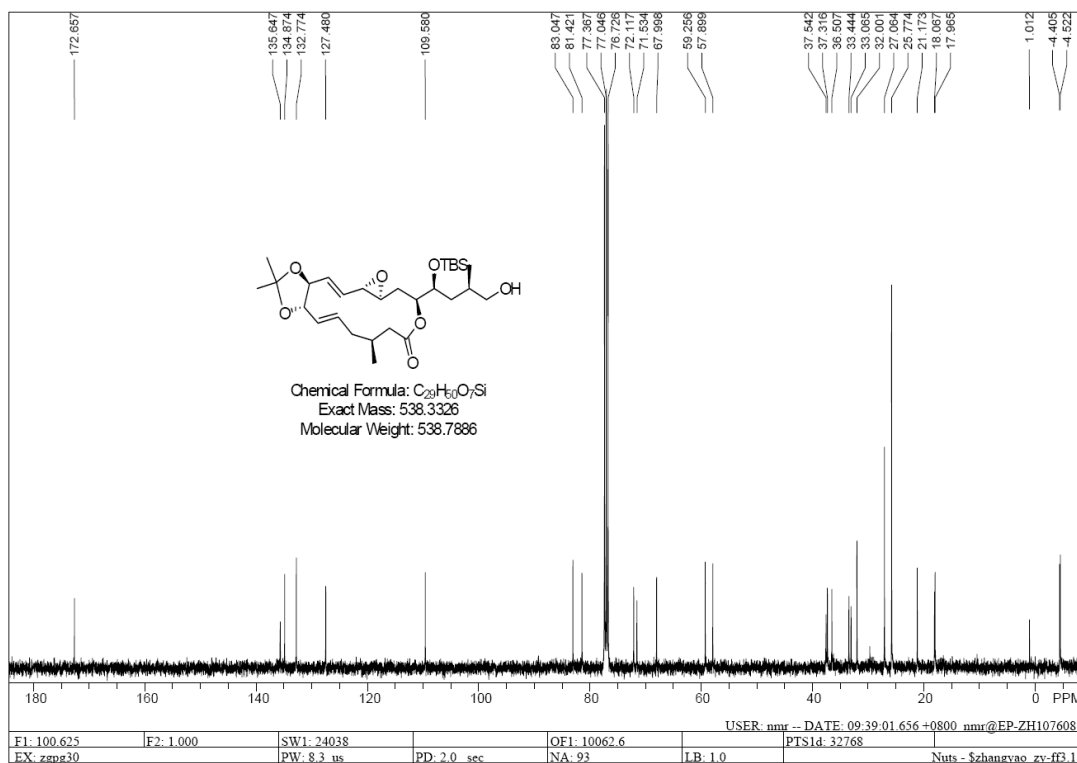

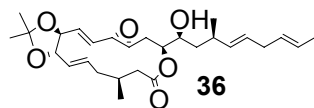

**7,8-O-isopropylidene Iriomoteolide-3a (1 )**

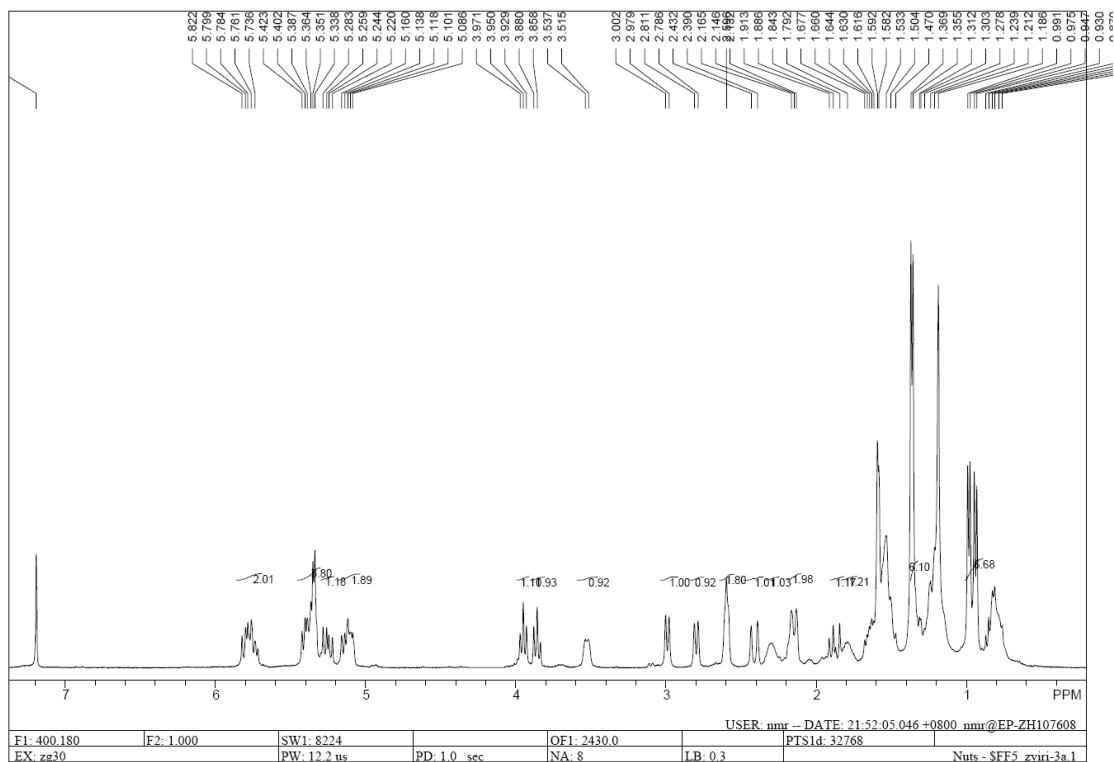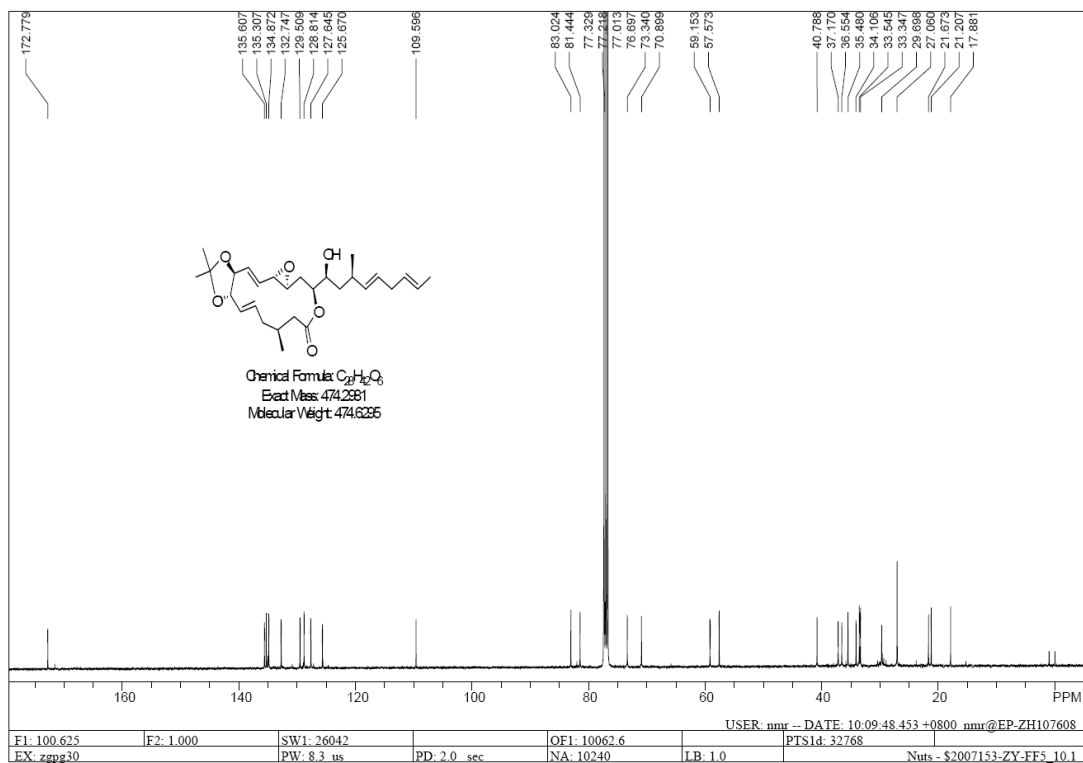

HPLC spectrum for **23**

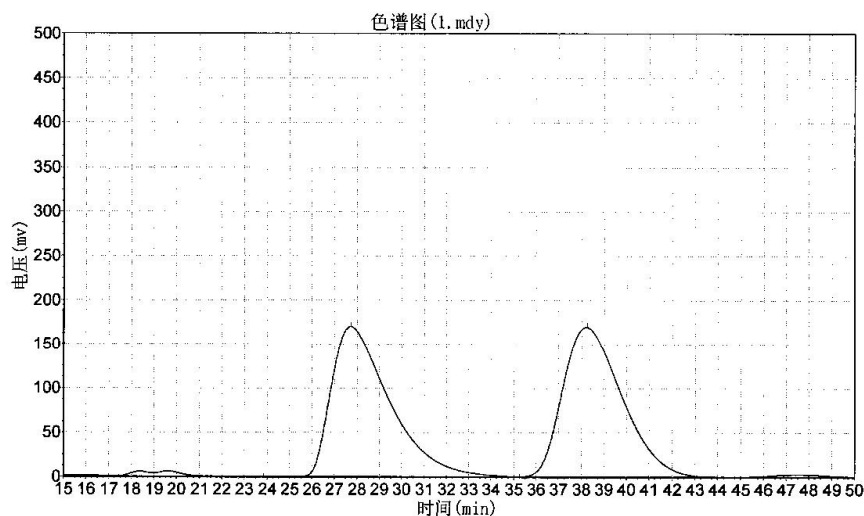

分析结果表

| 峰号 | 峰名 | 保留时间   | 峰高         | 峰面积          | 含量       |
|----|----|--------|------------|--------------|----------|
| 1  |    | 27.723 | 169905.625 | 30794914.000 | 49.6635  |
| 2  |    | 38.257 | 170205.500 | 31212188.000 | 50.3365  |
| 总计 |    |        | 340111.125 | 62007102.000 | 100.0000 |

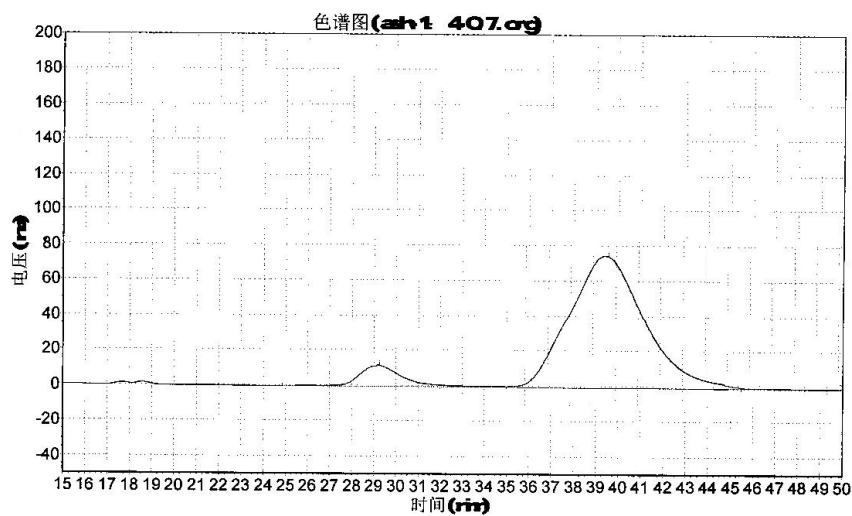

分析结果表

| 峰号       | 峰名 | 保留时间         | 峰高               | 峰面积                | 含量              |
|----------|----|--------------|------------------|--------------------|-----------------|
| <b>1</b> |    | <b>29.28</b> | <b>11938.211</b> | <b>189101.625</b>  | <b>8.3444</b>   |
| <b>2</b> |    | <b>41.68</b> | <b>74865.089</b> | <b>1746550.000</b> | <b>91.6556</b>  |
| 总计       |    |              | <b>86803.300</b> | <b>1935651.625</b> | <b>100.0000</b> |
